# Supplementary material for: Characterizing the Network of Drugs and Their Affected Metabolic Subpathways
Source: PLoS One. 2012 Oct 24;7(10):e47326. doi: 10.1371/journal.pone.0047326 (PMC3480395; doi:10.1371/journal.pone.0047326)
Supplement: Dataset S4 — The drug–disease association through metabolic subpathways. (XLS) [file pone.0047326.s010.xls]

## Sheet: ResultBox_001
	The drug–disease association through metabolic subpathways
drug_name	drug_class	disease_name	disease_class	fold enrichment ratio	P-value
lansoprazole	A	longevity	aging	7.95	0
nystatin	A	longevity	aging	6.625	0.00478143
omeprazole	A	longevity	aging	8.36842	0
ondansetron	A	longevity	aging	8.83333	0
pipenzolate bromide	A	longevity	aging	8.83333	0
riboflavin	A	longevity	aging	8.83333	0
tetracycline	A	longevity	aging	8.83333	0
acetohexamide	A	lung-cancer	cancer	4.92308	0.000295016
benfotiamine	A	brain-cancer	cancer	7.75758	3.24577e-07
benfotiamine	A	colon-cancer	cancer	3.65714	9.10793e-05
benfotiamine	A	oral-cancer	cancer	5.85143	0.00205931
benfotiamine	A	pancreatic-cancer	cancer	4.06349	0.000409834
carbenoxolone	A	lympha-cancer	cancer	3.87879	0.00888252
chlorpropamide	A	glioma-cancer	cancer	85.3333	9.19118e-05
cimetidine	A	brain-cancer	cancer	4.36364	2.04865e-05
cisapride	A	brain-cancer	cancer	6.20606	0.00106277
cisapride	A	lung-cancer	cancer	3.93846	0.00656411
cisapride	A	oral-cancer	cancer	8.192	0.000337734
cisapride	A	pancreatic-cancer	cancer	3.79259	0.00761052
doxycycline	A	brain-cancer	cancer	7.75758	0.000234106
doxycycline	A	colon-cancer	cancer	3.65714	0.00524562
doxycycline	A	lung-cancer	cancer	4.92308	0.00154884
doxycycline	A	oral-cancer	cancer	10.24	7.23715e-05
doxycycline	A	pancreatic-cancer	cancer	4.74074	0.00180929
hesperetin	A	brain-cancer	cancer	5.4303	2.92021e-05
hesperetin	A	colon-cancer	cancer	2.56	0.00516418
hesperetin	A	pancreatic-cancer	cancer	2.84444	0.00717613
lansoprazole	A	longevity	cancer	9.6	0
lansoprazole	A	adenomas-cancer	cancer	9.6	2.89413e-09
lansoprazole	A	biliary-cancer	cancer	7.68	5.81419e-08
lansoprazole	A	bladder-cancer	cancer	4.608	1.38178e-12
lansoprazole	A	brain-cancer	cancer	6.98182	1.11022e-16
lansoprazole	A	breast-cancer	cancer	5.06667	8.65974e-15
lansoprazole	A	cervical-cancer	cancer	12.16	0
lansoprazole	A	colon-cancer	cancer	3.47429	4.26831e-11
lansoprazole	A	esophageal-cancer	cancer	4.70204	8.92508e-13
lansoprazole	A	laryngeal-cancer	cancer	4.48	1.14398e-08
lansoprazole	A	leukemia-cancer	cancer	6.4	7.77156e-16
lansoprazole	A	liver-cancer	cancer	4.90213	3.59379e-13
lansoprazole	A	lung-cancer	cancer	4.43077	3.20666e-12
lansoprazole	A	lympha-cancer	cancer	5.23636	8.31557e-14
lansoprazole	A	mesothelioma-cancer	cancer	6.4	0.00706532
lansoprazole	A	myeloma-cancer	cancer	4.26667	0.00902896
lansoprazole	A	nasopharyngeal-cancer	cancer	10.9714	0
lansoprazole	A	oral-cancer	cancer	9.216	0
lansoprazole	A	ovarian-cancer	cancer	10.9714	0
lansoprazole	A	pancreatic-cancer	cancer	4.26667	7.14995e-12
lansoprazole	A	prostate-cancer	cancer	5.40444	1.88738e-15
lansoprazole	A	skin-cancer	cancer	3.2	0.00253922
mepenzolate bromide	A	brain-cancer	cancer	7.75758	0.000234106
mepenzolate bromide	A	colon-cancer	cancer	3.65714	0.00524562
mepenzolate bromide	A	lung-cancer	cancer	4.92308	0.00154884
mepenzolate bromide	A	oral-cancer	cancer	10.24	7.23715e-05
mepenzolate bromide	A	pancreatic-cancer	cancer	4.74074	0.00180929
metronidazole	A	brain-cancer	cancer	4.77389	2.72153e-05
metronidazole	A	colon-cancer	cancer	2.53187	0.00150555
metronidazole	A	lung-cancer	cancer	2.65089	0.00620403
metronidazole	A	oral-cancer	cancer	3.93846	0.00446849
metronidazole	A	pancreatic-cancer	cancer	2.91738	0.00132525
nadide	A	adenomas-cancer	cancer	14.2222	0.00590696
nadide	A	biliary-cancer	cancer	17.0667	0.000164645
nystatin	A	longevity	cancer	8	0.00274722
nystatin	A	brain-cancer	cancer	5.81818	0.00719486
nystatin	A	cervical-cancer	cancer	9.6	0.00156691
nystatin	A	leukemia-cancer	cancer	5.33333	0.00932365
nystatin	A	mesothelioma-cancer	cancer	21.3333	0.00269971
nystatin	A	nasopharyngeal-cancer	cancer	9.14286	0.00182236
nystatin	A	oral-cancer	cancer	7.68	0.00311197
nystatin	A	ovarian-cancer	cancer	9.14286	0.00182236
omeprazole	A	longevity	cancer	10.1053	0
omeprazole	A	adenomas-cancer	cancer	10.1053	1.61002e-09
omeprazole	A	biliary-cancer	cancer	7.18596	8.93471e-07
omeprazole	A	bladder-cancer	cancer	4.85053	1.58429e-13
omeprazole	A	brain-cancer	cancer	7.34928	0
omeprazole	A	breast-cancer	cancer	5.05263	6.4726e-14
omeprazole	A	cervical-cancer	cancer	12.1263	0
omeprazole	A	colon-cancer	cancer	3.46466	1.84993e-10
omeprazole	A	esophageal-cancer	cancer	4.94952	1.01807e-13
omeprazole	A	laryngeal-cancer	cancer	4.71579	3.82165e-09
omeprazole	A	leukemia-cancer	cancer	6.73684	1.11022e-16
omeprazole	A	liver-cancer	cancer	5.16013	4.06342e-14
omeprazole	A	lung-cancer	cancer	4.66397	3.71037e-13
omeprazole	A	lympha-cancer	cancer	5.51196	9.32587e-15
omeprazole	A	mesothelioma-cancer	cancer	6.73684	0.00606171
omeprazole	A	myeloma-cancer	cancer	4.49123	0.00741773
omeprazole	A	nasopharyngeal-cancer	cancer	11.5489	0
omeprazole	A	oral-cancer	cancer	9.70105	0
omeprazole	A	ovarian-cancer	cancer	11.5489	0
omeprazole	A	pancreatic-cancer	cancer	4.49123	8.3511e-13
omeprazole	A	prostate-cancer	cancer	5.38947	1.54321e-14
omeprazole	A	skin-cancer	cancer	3.36842	0.00178569
ondansetron	A	longevity	cancer	10.6667	0
ondansetron	A	adenomas-cancer	cancer	10.6667	8.57059e-10
ondansetron	A	biliary-cancer	cancer	7.58519	5.31049e-07
ondansetron	A	bladder-cancer	cancer	5.12	9.54792e-15
ondansetron	A	brain-cancer	cancer	7.75758	0
ondansetron	A	breast-cancer	cancer	5.33333	3.88578e-15
ondansetron	A	cervical-cancer	cancer	12.8	0
ondansetron	A	colon-cancer	cancer	3.65714	1.22778e-11
ondansetron	A	esophageal-cancer	cancer	5.22449	6.10623e-15
ondansetron	A	laryngeal-cancer	cancer	4.97778	1.11947e-09
ondansetron	A	leukemia-cancer	cancer	7.11111	0
ondansetron	A	liver-cancer	cancer	5.44681	2.44249e-15
ondansetron	A	lung-cancer	cancer	4.92308	2.25375e-14
ondansetron	A	lympha-cancer	cancer	5.81818	5.55112e-16
ondansetron	A	mesothelioma-cancer	cancer	7.11111	0.00515223
ondansetron	A	myeloma-cancer	cancer	4.74074	0.0060135
ondansetron	A	nasopharyngeal-cancer	cancer	12.1905	0
ondansetron	A	oral-cancer	cancer	10.24	0
ondansetron	A	ovarian-cancer	cancer	12.1905	0
ondansetron	A	pancreatic-cancer	cancer	4.74074	5.12923e-14
ondansetron	A	prostate-cancer	cancer	5.68889	8.88178e-16
ondansetron	A	skin-cancer	cancer	3.55556	0.00121998
pipenzolate bromide	A	longevity	cancer	10.6667	0
pipenzolate bromide	A	adenomas-cancer	cancer	10.6667	8.57059e-10
pipenzolate bromide	A	biliary-cancer	cancer	7.58519	5.31049e-07
pipenzolate bromide	A	bladder-cancer	cancer	5.12	9.54792e-15
pipenzolate bromide	A	brain-cancer	cancer	7.75758	0
pipenzolate bromide	A	breast-cancer	cancer	5.33333	3.88578e-15
pipenzolate bromide	A	cervical-cancer	cancer	12.8	0
pipenzolate bromide	A	colon-cancer	cancer	3.65714	1.22778e-11
pipenzolate bromide	A	esophageal-cancer	cancer	5.22449	6.10623e-15
pipenzolate bromide	A	laryngeal-cancer	cancer	4.97778	1.11947e-09
pipenzolate bromide	A	leukemia-cancer	cancer	7.11111	0
pipenzolate bromide	A	liver-cancer	cancer	5.44681	2.44249e-15
pipenzolate bromide	A	lung-cancer	cancer	4.92308	2.25375e-14
pipenzolate bromide	A	lympha-cancer	cancer	5.81818	5.55112e-16
pipenzolate bromide	A	mesothelioma-cancer	cancer	7.11111	0.00515223
pipenzolate bromide	A	myeloma-cancer	cancer	4.74074	0.0060135
pipenzolate bromide	A	nasopharyngeal-cancer	cancer	12.1905	0
pipenzolate bromide	A	oral-cancer	cancer	10.24	0
pipenzolate bromide	A	ovarian-cancer	cancer	12.1905	0
pipenzolate bromide	A	pancreatic-cancer	cancer	4.74074	5.12923e-14
pipenzolate bromide	A	prostate-cancer	cancer	5.68889	8.88178e-16
pipenzolate bromide	A	skin-cancer	cancer	3.55556	0.00121998
propantheline bromide	A	glioma-cancer	cancer	15.5152	0.00493573
riboflavin	A	longevity	cancer	10.6667	0
riboflavin	A	adenomas-cancer	cancer	10.6667	8.57059e-10
riboflavin	A	biliary-cancer	cancer	7.58519	5.31049e-07
riboflavin	A	bladder-cancer	cancer	5.12	9.54792e-15
riboflavin	A	brain-cancer	cancer	7.75758	0
riboflavin	A	breast-cancer	cancer	5.33333	3.88578e-15
riboflavin	A	cervical-cancer	cancer	12.8	0
riboflavin	A	colon-cancer	cancer	3.65714	1.22778e-11
riboflavin	A	esophageal-cancer	cancer	5.22449	6.10623e-15
riboflavin	A	laryngeal-cancer	cancer	4.97778	1.11947e-09
riboflavin	A	leukemia-cancer	cancer	7.11111	0
riboflavin	A	liver-cancer	cancer	5.44681	2.44249e-15
riboflavin	A	lung-cancer	cancer	4.92308	2.25375e-14
riboflavin	A	lympha-cancer	cancer	5.81818	5.55112e-16
riboflavin	A	mesothelioma-cancer	cancer	7.11111	0.00515223
riboflavin	A	myeloma-cancer	cancer	4.74074	0.0060135
riboflavin	A	nasopharyngeal-cancer	cancer	12.1905	0
riboflavin	A	oral-cancer	cancer	10.24	0
riboflavin	A	ovarian-cancer	cancer	12.1905	0
riboflavin	A	pancreatic-cancer	cancer	4.74074	5.12923e-14
riboflavin	A	prostate-cancer	cancer	5.68889	8.88178e-16
riboflavin	A	skin-cancer	cancer	3.55556	0.00121998
succinylsulfathiazole	A	brain-cancer	cancer	6.03367	9.64527e-06
succinylsulfathiazole	A	colon-cancer	cancer	2.84444	0.00198838
succinylsulfathiazole	A	oral-cancer	cancer	4.55111	0.00645739
succinylsulfathiazole	A	pancreatic-cancer	cancer	3.16049	0.00343405
tetracycline	A	longevity	cancer	10.6667	0
tetracycline	A	adenomas-cancer	cancer	10.6667	8.57059e-10
tetracycline	A	biliary-cancer	cancer	7.58519	5.31049e-07
tetracycline	A	bladder-cancer	cancer	5.12	9.54792e-15
tetracycline	A	brain-cancer	cancer	7.75758	0
tetracycline	A	breast-cancer	cancer	5.33333	3.88578e-15
tetracycline	A	cervical-cancer	cancer	12.8	0
tetracycline	A	colon-cancer	cancer	3.65714	1.22778e-11
tetracycline	A	esophageal-cancer	cancer	5.22449	6.10623e-15
tetracycline	A	laryngeal-cancer	cancer	4.97778	1.11947e-09
tetracycline	A	leukemia-cancer	cancer	7.11111	0
tetracycline	A	liver-cancer	cancer	5.44681	2.44249e-15
tetracycline	A	lung-cancer	cancer	4.92308	2.25375e-14
tetracycline	A	lympha-cancer	cancer	5.81818	5.55112e-16
tetracycline	A	mesothelioma-cancer	cancer	7.11111	0.00515223
tetracycline	A	myeloma-cancer	cancer	4.74074	0.0060135
tetracycline	A	nasopharyngeal-cancer	cancer	12.1905	0
tetracycline	A	oral-cancer	cancer	10.24	0
tetracycline	A	ovarian-cancer	cancer	12.1905	0
tetracycline	A	pancreatic-cancer	cancer	4.74074	5.12923e-14
tetracycline	A	prostate-cancer	cancer	5.68889	8.88178e-16
tetracycline	A	skin-cancer	cancer	3.55556	0.00121998
acetohexamide	A	lung-cancer	cardiovascular	5	0.000272844
benfotiamine	A	brain-cancer	cardiovascular	7.87879	2.90822e-07
benfotiamine	A	colon-cancer	cardiovascular	3.71429	8.16072e-05
benfotiamine	A	oral-cancer	cardiovascular	5.94286	0.00194126
benfotiamine	A	pancreatic-cancer	cardiovascular	4.12698	0.000374245
carbenoxolone	A	lympha-cancer	cardiovascular	3.93939	0.00838319
chlorpropamide	A	glioma-cancer	cardiovascular	86.6667	8.91001e-05
chlorpropamide	A	thyroid-cancer	cardiovascular	11.3043	0.00751411
cimetidine	A	brain-cancer	cardiovascular	4.43182	1.7973e-05
cisapride	A	brain-cancer	cardiovascular	6.30303	0.00100008
cisapride	A	lung-cancer	cardiovascular	4	0.00618447
cisapride	A	oral-cancer	cardiovascular	8.32	0.000317663
cisapride	A	pancreatic-cancer	cardiovascular	3.85185	0.00717135
doxycycline	A	brain-cancer	cardiovascular	7.87879	0.000219948
doxycycline	A	colon-cancer	cardiovascular	3.71429	0.00492839
doxycycline	A	lung-cancer	cardiovascular	5	0.00145517
doxycycline	A	oral-cancer	cardiovascular	10.4	6.79948e-05
doxycycline	A	pancreatic-cancer	cardiovascular	4.81481	0.00169988
hesperetin	A	brain-cancer	cardiovascular	5.51515	2.62906e-05
hesperetin	A	colon-cancer	cardiovascular	2.6	0.00468953
hesperetin	A	oral-cancer	cardiovascular	4.16	0.00950031
hesperetin	A	pancreatic-cancer	cardiovascular	2.88889	0.00661379
lansoprazole	A	longevity	cardiovascular	9.75	0
lansoprazole	A	adenomas-cancer	cardiovascular	9.75	2.51669e-09
lansoprazole	A	biliary-cancer	cardiovascular	7.8	5.06629e-08
lansoprazole	A	bladder-cancer	cardiovascular	4.68	1.04028e-12
lansoprazole	A	brain-cancer	cardiovascular	7.09091	1.11022e-16
lansoprazole	A	breast-cancer	cardiovascular	5.14583	6.32827e-15
lansoprazole	A	cervical-cancer	cardiovascular	12.35	0
lansoprazole	A	colon-cancer	cardiovascular	3.52857	3.15851e-11
lansoprazole	A	esophageal-cancer	cardiovascular	4.77551	6.71796e-13
lansoprazole	A	laryngeal-cancer	cardiovascular	4.55	9.25745e-09
lansoprazole	A	leukemia-cancer	cardiovascular	6.5	5.55112e-16
lansoprazole	A	liver-cancer	cardiovascular	4.97872	2.70339e-13
lansoprazole	A	lung-cancer	cardiovascular	4.5	2.41507e-12
lansoprazole	A	lympha-cancer	cardiovascular	5.31818	6.25056e-14
lansoprazole	A	mesothelioma-cancer	cardiovascular	6.5	0.0067597
lansoprazole	A	myeloma-cancer	cardiovascular	4.33333	0.00854018
lansoprazole	A	nasopharyngeal-cancer	cardiovascular	11.1429	0
lansoprazole	A	oral-cancer	cardiovascular	9.36	0
lansoprazole	A	ovarian-cancer	cardiovascular	11.1429	0
lansoprazole	A	pancreatic-cancer	cardiovascular	4.33333	5.3868e-12
lansoprazole	A	prostate-cancer	cardiovascular	5.48889	1.33227e-15
lansoprazole	A	skin-cancer	cardiovascular	3.25	0.00231367
lansoprazole	A	stomach-cancer	cardiovascular	5.85	7.10543e-15
lansoprazole	A	testicular-cancer	cardiovascular	13	0
lansoprazole	A	thyroid-cancer	cardiovascular	10.1739	0
mepenzolate bromide	A	brain-cancer	cardiovascular	7.87879	0.000219948
mepenzolate bromide	A	colon-cancer	cardiovascular	3.71429	0.00492839
mepenzolate bromide	A	lung-cancer	cardiovascular	5	0.00145517
mepenzolate bromide	A	oral-cancer	cardiovascular	10.4	6.79948e-05
mepenzolate bromide	A	pancreatic-cancer	cardiovascular	4.81481	0.00169988
metronidazole	A	brain-cancer	cardiovascular	4.84848	2.41893e-05
metronidazole	A	colon-cancer	cardiovascular	2.57143	0.00133055
metronidazole	A	lung-cancer	cardiovascular	2.69231	0.00565856
metronidazole	A	oral-cancer	cardiovascular	4	0.00416999
metronidazole	A	pancreatic-cancer	cardiovascular	2.96296	0.00118713
nadide	A	adenomas-cancer	cardiovascular	14.4444	0.00572865
nadide	A	biliary-cancer	cardiovascular	17.3333	0.000157134
nystatin	A	longevity	cardiovascular	8.125	0.0026246
nystatin	A	brain-cancer	cardiovascular	5.90909	0.00687706
nystatin	A	cervical-cancer	cardiovascular	9.75	0.00149667
nystatin	A	leukemia-cancer	cardiovascular	5.41667	0.00891331
nystatin	A	mesothelioma-cancer	cardiovascular	21.6667	0.00261799
nystatin	A	nasopharyngeal-cancer	cardiovascular	9.28571	0.00174075
nystatin	A	oral-cancer	cardiovascular	7.8	0.00297323
nystatin	A	ovarian-cancer	cardiovascular	9.28571	0.00174075
nystatin	A	testicular-cancer	cardiovascular	10.8333	0.00107788
nystatin	A	thyroid-cancer	cardiovascular	8.47826	0.00230366
omeprazole	A	longevity	cardiovascular	10.2632	0
omeprazole	A	adenomas-cancer	cardiovascular	10.2632	1.39978e-09
omeprazole	A	biliary-cancer	cardiovascular	7.29825	7.91563e-07
omeprazole	A	bladder-cancer	cardiovascular	4.92632	1.19016e-13
omeprazole	A	brain-cancer	cardiovascular	7.46411	0
omeprazole	A	breast-cancer	cardiovascular	5.13158	4.86278e-14
omeprazole	A	cervical-cancer	cardiovascular	12.3158	0
omeprazole	A	colon-cancer	cardiovascular	3.5188	1.392e-10
omeprazole	A	esophageal-cancer	cardiovascular	5.02685	7.64944e-14
omeprazole	A	laryngeal-cancer	cardiovascular	4.78947	3.08681e-09
omeprazole	A	leukemia-cancer	cardiovascular	6.84211	1.11022e-16
omeprazole	A	liver-cancer	cardiovascular	5.24076	3.05311e-14
omeprazole	A	lung-cancer	cardiovascular	4.73684	2.78777e-13
omeprazole	A	lympha-cancer	cardiovascular	5.59809	6.99441e-15
omeprazole	A	mesothelioma-cancer	cardiovascular	6.84211	0.00579862
omeprazole	A	myeloma-cancer	cardiovascular	4.5614	0.00701313
omeprazole	A	nasopharyngeal-cancer	cardiovascular	11.7293	0
omeprazole	A	oral-cancer	cardiovascular	9.85263	0
omeprazole	A	ovarian-cancer	cardiovascular	11.7293	0
omeprazole	A	pancreatic-cancer	cardiovascular	4.5614	6.27387e-13
omeprazole	A	prostate-cancer	cardiovascular	5.47368	1.15463e-14
omeprazole	A	skin-cancer	cardiovascular	3.42105	0.00162492
omeprazole	A	stomach-cancer	cardiovascular	6.15789	7.77156e-16
omeprazole	A	testicular-cancer	cardiovascular	13.6842	0
omeprazole	A	thyroid-cancer	cardiovascular	10.7094	0
ondansetron	A	longevity	cardiovascular	10.8333	0
ondansetron	A	adenomas-cancer	cardiovascular	10.8333	7.45003e-10
ondansetron	A	biliary-cancer	cardiovascular	7.7037	4.70273e-07
ondansetron	A	bladder-cancer	cardiovascular	5.2	7.10543e-15
ondansetron	A	brain-cancer	cardiovascular	7.87879	0
ondansetron	A	breast-cancer	cardiovascular	5.41667	2.88658e-15
ondansetron	A	cervical-cancer	cardiovascular	13	0
ondansetron	A	colon-cancer	cardiovascular	3.71429	9.19886e-12
ondansetron	A	esophageal-cancer	cardiovascular	5.30612	4.55191e-15
ondansetron	A	laryngeal-cancer	cardiovascular	5.05556	9.02532e-10
ondansetron	A	leukemia-cancer	cardiovascular	7.22222	0
ondansetron	A	liver-cancer	cardiovascular	5.53191	1.77636e-15
ondansetron	A	lung-cancer	cardiovascular	5	1.68754e-14
ondansetron	A	lympha-cancer	cardiovascular	5.90909	4.44089e-16
ondansetron	A	mesothelioma-cancer	cardiovascular	7.22222	0.00492787
ondansetron	A	myeloma-cancer	cardiovascular	4.81481	0.00568305
ondansetron	A	nasopharyngeal-cancer	cardiovascular	12.381	0
ondansetron	A	oral-cancer	cardiovascular	10.4	0
ondansetron	A	ovarian-cancer	cardiovascular	12.381	0
ondansetron	A	pancreatic-cancer	cardiovascular	4.81481	3.84137e-14
ondansetron	A	prostate-cancer	cardiovascular	5.77778	6.66134e-16
ondansetron	A	skin-cancer	cardiovascular	3.61111	0.00110869
ondansetron	A	stomach-cancer	cardiovascular	6.5	0
ondansetron	A	testicular-cancer	cardiovascular	14.4444	0
ondansetron	A	thyroid-cancer	cardiovascular	11.3043	0
pipenzolate bromide	A	longevity	cardiovascular	10.8333	0
pipenzolate bromide	A	adenomas-cancer	cardiovascular	10.8333	7.45003e-10
pipenzolate bromide	A	biliary-cancer	cardiovascular	7.7037	4.70273e-07
pipenzolate bromide	A	bladder-cancer	cardiovascular	5.2	7.10543e-15
pipenzolate bromide	A	brain-cancer	cardiovascular	7.87879	0
pipenzolate bromide	A	breast-cancer	cardiovascular	5.41667	2.88658e-15
pipenzolate bromide	A	cervical-cancer	cardiovascular	13	0
pipenzolate bromide	A	colon-cancer	cardiovascular	3.71429	9.19886e-12
pipenzolate bromide	A	esophageal-cancer	cardiovascular	5.30612	4.55191e-15
pipenzolate bromide	A	laryngeal-cancer	cardiovascular	5.05556	9.02532e-10
pipenzolate bromide	A	leukemia-cancer	cardiovascular	7.22222	0
pipenzolate bromide	A	liver-cancer	cardiovascular	5.53191	1.77636e-15
pipenzolate bromide	A	lung-cancer	cardiovascular	5	1.68754e-14
pipenzolate bromide	A	lympha-cancer	cardiovascular	5.90909	4.44089e-16
pipenzolate bromide	A	mesothelioma-cancer	cardiovascular	7.22222	0.00492787
pipenzolate bromide	A	myeloma-cancer	cardiovascular	4.81481	0.00568305
pipenzolate bromide	A	nasopharyngeal-cancer	cardiovascular	12.381	0
pipenzolate bromide	A	oral-cancer	cardiovascular	10.4	0
pipenzolate bromide	A	ovarian-cancer	cardiovascular	12.381	0
pipenzolate bromide	A	pancreatic-cancer	cardiovascular	4.81481	3.84137e-14
pipenzolate bromide	A	prostate-cancer	cardiovascular	5.77778	6.66134e-16
pipenzolate bromide	A	skin-cancer	cardiovascular	3.61111	0.00110869
pipenzolate bromide	A	stomach-cancer	cardiovascular	6.5	0
pipenzolate bromide	A	testicular-cancer	cardiovascular	14.4444	0
pipenzolate bromide	A	thyroid-cancer	cardiovascular	11.3043	0
propantheline bromide	A	glioma-cancer	cardiovascular	15.7576	0.00478654
riboflavin	A	longevity	cardiovascular	10.8333	0
riboflavin	A	adenomas-cancer	cardiovascular	10.8333	7.45003e-10
riboflavin	A	biliary-cancer	cardiovascular	7.7037	4.70273e-07
riboflavin	A	bladder-cancer	cardiovascular	5.2	7.10543e-15
riboflavin	A	brain-cancer	cardiovascular	7.87879	0
riboflavin	A	breast-cancer	cardiovascular	5.41667	2.88658e-15
riboflavin	A	cervical-cancer	cardiovascular	13	0
riboflavin	A	colon-cancer	cardiovascular	3.71429	9.19886e-12
riboflavin	A	esophageal-cancer	cardiovascular	5.30612	4.55191e-15
riboflavin	A	laryngeal-cancer	cardiovascular	5.05556	9.02532e-10
riboflavin	A	leukemia-cancer	cardiovascular	7.22222	0
riboflavin	A	liver-cancer	cardiovascular	5.53191	1.77636e-15
riboflavin	A	lung-cancer	cardiovascular	5	1.68754e-14
riboflavin	A	lympha-cancer	cardiovascular	5.90909	4.44089e-16
riboflavin	A	mesothelioma-cancer	cardiovascular	7.22222	0.00492787
riboflavin	A	myeloma-cancer	cardiovascular	4.81481	0.00568305
riboflavin	A	nasopharyngeal-cancer	cardiovascular	12.381	0
riboflavin	A	oral-cancer	cardiovascular	10.4	0
riboflavin	A	ovarian-cancer	cardiovascular	12.381	0
riboflavin	A	pancreatic-cancer	cardiovascular	4.81481	3.84137e-14
riboflavin	A	prostate-cancer	cardiovascular	5.77778	6.66134e-16
riboflavin	A	skin-cancer	cardiovascular	3.61111	0.00110869
riboflavin	A	stomach-cancer	cardiovascular	6.5	0
riboflavin	A	testicular-cancer	cardiovascular	14.4444	0
riboflavin	A	thyroid-cancer	cardiovascular	11.3043	0
succinylsulfathiazole	A	brain-cancer	cardiovascular	6.12795	8.66973e-06
succinylsulfathiazole	A	colon-cancer	cardiovascular	2.88889	0.00179762
succinylsulfathiazole	A	oral-cancer	cardiovascular	4.62222	0.00610082
succinylsulfathiazole	A	pancreatic-cancer	cardiovascular	3.20988	0.00315525
tetracycline	A	longevity	cardiovascular	10.8333	0
tetracycline	A	adenomas-cancer	cardiovascular	10.8333	7.45003e-10
tetracycline	A	biliary-cancer	cardiovascular	7.7037	4.70273e-07
tetracycline	A	bladder-cancer	cardiovascular	5.2	7.10543e-15
tetracycline	A	brain-cancer	cardiovascular	7.87879	0
tetracycline	A	breast-cancer	cardiovascular	5.41667	2.88658e-15
tetracycline	A	cervical-cancer	cardiovascular	13	0
tetracycline	A	colon-cancer	cardiovascular	3.71429	9.19886e-12
tetracycline	A	esophageal-cancer	cardiovascular	5.30612	4.55191e-15
tetracycline	A	laryngeal-cancer	cardiovascular	5.05556	9.02532e-10
tetracycline	A	leukemia-cancer	cardiovascular	7.22222	0
tetracycline	A	liver-cancer	cardiovascular	5.53191	1.77636e-15
tetracycline	A	lung-cancer	cardiovascular	5	1.68754e-14
tetracycline	A	lympha-cancer	cardiovascular	5.90909	4.44089e-16
tetracycline	A	mesothelioma-cancer	cardiovascular	7.22222	0.00492787
tetracycline	A	myeloma-cancer	cardiovascular	4.81481	0.00568305
tetracycline	A	nasopharyngeal-cancer	cardiovascular	12.381	0
tetracycline	A	oral-cancer	cardiovascular	10.4	0
tetracycline	A	ovarian-cancer	cardiovascular	12.381	0
tetracycline	A	pancreatic-cancer	cardiovascular	4.81481	3.84137e-14
tetracycline	A	prostate-cancer	cardiovascular	5.77778	6.66134e-16
tetracycline	A	skin-cancer	cardiovascular	3.61111	0.00110869
tetracycline	A	stomach-cancer	cardiovascular	6.5	0
tetracycline	A	testicular-cancer	cardiovascular	14.4444	0
tetracycline	A	thyroid-cancer	cardiovascular	11.3043	0
lansoprazole	A	longevity	chemdependency	8.8875	0
lansoprazole	A	adenomas-cancer	chemdependency	8.8875	5.79938e-09
lansoprazole	A	biliary-cancer	chemdependency	7.11	1.15262e-07
lansoprazole	A	bladder-cancer	chemdependency	4.266	5.6759e-12
nadide	A	adenomas-cancer	chemdependency	13.1667	0.00687917
nadide	A	biliary-cancer	chemdependency	15.8	0.000207699
nystatin	A	longevity	chemdependency	7.40625	0.00344693
omeprazole	A	longevity	chemdependency	9.35526	0
omeprazole	A	adenomas-cancer	chemdependency	9.35526	3.22944e-09
omeprazole	A	biliary-cancer	chemdependency	6.65263	1.63051e-06
omeprazole	A	bladder-cancer	chemdependency	4.49053	6.59139e-13
ondansetron	A	longevity	chemdependency	9.875	0
ondansetron	A	adenomas-cancer	chemdependency	9.875	1.72082e-09
ondansetron	A	biliary-cancer	chemdependency	7.02222	9.71344e-07
ondansetron	A	bladder-cancer	chemdependency	4.74	4.03011e-14
pipenzolate bromide	A	longevity	chemdependency	9.875	0
pipenzolate bromide	A	adenomas-cancer	chemdependency	9.875	1.72082e-09
pipenzolate bromide	A	biliary-cancer	chemdependency	7.02222	9.71344e-07
pipenzolate bromide	A	bladder-cancer	chemdependency	4.74	4.03011e-14
riboflavin	A	longevity	chemdependency	9.875	0
riboflavin	A	adenomas-cancer	chemdependency	9.875	1.72082e-09
riboflavin	A	biliary-cancer	chemdependency	7.02222	9.71344e-07
riboflavin	A	bladder-cancer	chemdependency	4.74	4.03011e-14
tetracycline	A	longevity	chemdependency	9.875	0
tetracycline	A	adenomas-cancer	chemdependency	9.875	1.72082e-09
tetracycline	A	biliary-cancer	chemdependency	7.02222	9.71344e-07
tetracycline	A	bladder-cancer	chemdependency	4.74	4.03011e-14
lansoprazole	A	longevity	developmental	7.5	0
lansoprazole	A	adenomas-cancer	developmental	7.5	2.67782e-08
nadide	A	adenomas-cancer	developmental	11.1111	0.00961474
nystatin	A	longevity	developmental	6.25	0.00567133
omeprazole	A	longevity	developmental	7.89474	0
omeprazole	A	adenomas-cancer	developmental	7.89474	1.49495e-08
ondansetron	A	longevity	developmental	8.33333	0
ondansetron	A	adenomas-cancer	developmental	8.33333	7.98595e-09
pipenzolate bromide	A	longevity	developmental	8.33333	0
pipenzolate bromide	A	adenomas-cancer	developmental	8.33333	7.98595e-09
riboflavin	A	longevity	developmental	8.33333	0
riboflavin	A	adenomas-cancer	developmental	8.33333	7.98595e-09
tetracycline	A	longevity	developmental	8.33333	0
tetracycline	A	adenomas-cancer	developmental	8.33333	7.98595e-09
benfotiamine	A	brain-cancer	hematological	6.72727	8.91425e-07
benfotiamine	A	colon-cancer	hematological	3.17143	0.000250142
cimetidine	A	brain-cancer	hematological	3.78409	6.76618e-05
cisapride	A	brain-cancer	hematological	5.38182	0.00185625
doxycycline	A	brain-cancer	hematological	6.72727	0.000415465
doxycycline	A	colon-cancer	hematological	3.17143	0.00930934
hesperetin	A	brain-cancer	hematological	4.70909	7.64209e-05
lansoprazole	A	longevity	hematological	8.325	0
lansoprazole	A	adenomas-cancer	hematological	8.325	1.04546e-08
lansoprazole	A	biliary-cancer	hematological	6.66	2.05737e-07
lansoprazole	A	bladder-cancer	hematological	3.996	1.88256e-11
lansoprazole	A	brain-cancer	hematological	6.05455	1.33227e-15
lansoprazole	A	breast-cancer	hematological	4.39375	1.40776e-13
lansoprazole	A	cervical-cancer	hematological	10.545	0
lansoprazole	A	colon-cancer	hematological	3.01286	6.82151e-10
mepenzolate bromide	A	brain-cancer	hematological	6.72727	0.000415465
mepenzolate bromide	A	colon-cancer	hematological	3.17143	0.00930934
metronidazole	A	brain-cancer	hematological	4.13986	7.99406e-05
metronidazole	A	colon-cancer	hematological	2.1956	0.00460439
nadide	A	adenomas-cancer	hematological	12.3333	0.00782683
nadide	A	biliary-cancer	hematological	14.8	0.000252927
nystatin	A	longevity	hematological	6.9375	0.00417677
nystatin	A	cervical-cancer	hematological	8.325	0.00238725
omeprazole	A	longevity	hematological	8.76316	0
omeprazole	A	adenomas-cancer	hematological	8.76316	5.82709e-09
omeprazole	A	biliary-cancer	hematological	6.23158	2.7121e-06
omeprazole	A	bladder-cancer	hematological	4.20632	2.21279e-12
omeprazole	A	brain-cancer	hematological	6.37321	1.11022e-16
omeprazole	A	breast-cancer	hematological	4.38158	9.0572e-13
omeprazole	A	cervical-cancer	hematological	10.5158	0
omeprazole	A	colon-cancer	hematological	3.00451	2.53292e-09
ondansetron	A	longevity	hematological	9.25	0
ondansetron	A	adenomas-cancer	hematological	9.25	3.1078e-09
ondansetron	A	biliary-cancer	hematological	6.57778	1.6191e-06
ondansetron	A	bladder-cancer	hematological	4.44	1.36779e-13
ondansetron	A	brain-cancer	hematological	6.72727	0
ondansetron	A	breast-cancer	hematological	4.625	5.54001e-14
ondansetron	A	cervical-cancer	hematological	11.1	0
ondansetron	A	colon-cancer	hematological	3.17143	1.75754e-10
pipenzolate bromide	A	longevity	hematological	9.25	0
pipenzolate bromide	A	adenomas-cancer	hematological	9.25	3.1078e-09
pipenzolate bromide	A	biliary-cancer	hematological	6.57778	1.6191e-06
pipenzolate bromide	A	bladder-cancer	hematological	4.44	1.36779e-13
pipenzolate bromide	A	brain-cancer	hematological	6.72727	0
pipenzolate bromide	A	breast-cancer	hematological	4.625	5.54001e-14
pipenzolate bromide	A	cervical-cancer	hematological	11.1	0
pipenzolate bromide	A	colon-cancer	hematological	3.17143	1.75754e-10
riboflavin	A	longevity	hematological	9.25	0
riboflavin	A	adenomas-cancer	hematological	9.25	3.1078e-09
riboflavin	A	biliary-cancer	hematological	6.57778	1.6191e-06
riboflavin	A	bladder-cancer	hematological	4.44	1.36779e-13
riboflavin	A	brain-cancer	hematological	6.72727	0
riboflavin	A	breast-cancer	hematological	4.625	5.54001e-14
riboflavin	A	cervical-cancer	hematological	11.1	0
riboflavin	A	colon-cancer	hematological	3.17143	1.75754e-10
succinylsulfathiazole	A	brain-cancer	hematological	5.23232	2.56525e-05
succinylsulfathiazole	A	colon-cancer	hematological	2.46667	0.00498197
tetracycline	A	longevity	hematological	9.25	0
tetracycline	A	adenomas-cancer	hematological	9.25	3.1078e-09
tetracycline	A	biliary-cancer	hematological	6.57778	1.6191e-06
tetracycline	A	bladder-cancer	hematological	4.44	1.36779e-13
tetracycline	A	brain-cancer	hematological	6.72727	0
tetracycline	A	breast-cancer	hematological	4.625	5.54001e-14
tetracycline	A	cervical-cancer	hematological	11.1	0
tetracycline	A	colon-cancer	hematological	3.17143	1.75754e-10
acetohexamide	A	lung-cancer	immune	5.03846	0.00026251
benfotiamine	A	brain-cancer	immune	7.93939	2.7546e-07
benfotiamine	A	colon-cancer	immune	3.74286	7.72966e-05
benfotiamine	A	oral-cancer	immune	5.98857	0.0018854
benfotiamine	A	pancreatic-cancer	immune	4.15873	0.000357807
carbenoxolone	A	lympha-cancer	immune	3.9697	0.00814664
chlorpropamide	A	glioma-cancer	immune	87.3333	8.77424e-05
cimetidine	A	brain-cancer	immune	4.46591	1.6846e-05
cisapride	A	brain-cancer	immune	6.35152	0.000970466
cisapride	A	lung-cancer	immune	4.03077	0.00600492
cisapride	A	oral-cancer	immune	8.384	0.000308187
cisapride	A	pancreatic-cancer	immune	3.88148	0.00696362
doxycycline	A	brain-cancer	immune	7.93939	0.000213271
doxycycline	A	colon-cancer	immune	3.74286	0.00477877
doxycycline	A	lung-cancer	immune	5.03846	0.00141099
doxycycline	A	oral-cancer	immune	10.48	6.59306e-05
doxycycline	A	pancreatic-cancer	immune	4.85185	0.00164827
hesperetin	A	brain-cancer	immune	5.55758	2.49601e-05
hesperetin	A	colon-cancer	immune	2.62	0.00447089
hesperetin	A	oral-cancer	immune	4.192	0.00924203
hesperetin	A	pancreatic-cancer	immune	2.91111	0.00635183
lansoprazole	A	longevity	immune	9.825	0
lansoprazole	A	adenomas-cancer	immune	9.825	2.34874e-09
lansoprazole	A	biliary-cancer	immune	7.86	4.73292e-08
lansoprazole	A	bladder-cancer	immune	4.716	9.04166e-13
lansoprazole	A	brain-cancer	immune	7.14545	1.11022e-16
lansoprazole	A	breast-cancer	immune	5.18542	5.44009e-15
lansoprazole	A	cervical-cancer	immune	12.445	0
lansoprazole	A	colon-cancer	immune	3.55571	2.72182e-11
lansoprazole	A	esophageal-cancer	immune	4.81224	5.83755e-13
lansoprazole	A	laryngeal-cancer	immune	4.585	8.33752e-09
lansoprazole	A	leukemia-cancer	immune	6.55	5.55112e-16
lansoprazole	A	liver-cancer	immune	5.01702	2.34923e-13
lansoprazole	A	lung-cancer	immune	4.53462	2.09932e-12
lansoprazole	A	lympha-cancer	immune	5.35909	5.44009e-14
lansoprazole	A	mesothelioma-cancer	immune	6.55	0.00661347
lansoprazole	A	myeloma-cancer	immune	4.36667	0.00830814
lansoprazole	A	nasopharyngeal-cancer	immune	11.2286	0
lansoprazole	A	oral-cancer	immune	9.432	0
lansoprazole	A	ovarian-cancer	immune	11.2286	0
lansoprazole	A	pancreatic-cancer	immune	4.36667	4.68325e-12
lansoprazole	A	prostate-cancer	immune	5.53111	1.22125e-15
lansoprazole	A	skin-cancer	immune	3.275	0.00220948
lansoprazole	A	stomach-cancer	immune	5.895	6.21725e-15
mepenzolate bromide	A	brain-cancer	immune	7.93939	0.000213271
mepenzolate bromide	A	colon-cancer	immune	3.74286	0.00477877
mepenzolate bromide	A	lung-cancer	immune	5.03846	0.00141099
mepenzolate bromide	A	oral-cancer	immune	10.48	6.59306e-05
mepenzolate bromide	A	pancreatic-cancer	immune	4.85185	0.00164827
metronidazole	A	brain-cancer	immune	4.88578	2.28194e-05
metronidazole	A	colon-cancer	immune	2.59121	0.00125156
metronidazole	A	lung-cancer	immune	2.71302	0.00540631
metronidazole	A	oral-cancer	immune	4.03077	0.00402969
metronidazole	A	pancreatic-cancer	immune	2.98575	0.00112417
nadide	A	adenomas-cancer	immune	14.5556	0.00564251
nadide	A	biliary-cancer	immune	17.4667	0.000153549
nystatin	A	longevity	immune	8.1875	0.00256602
nystatin	A	brain-cancer	immune	5.95455	0.00672515
nystatin	A	cervical-cancer	immune	9.825	0.00146311
nystatin	A	leukemia-cancer	immune	5.45833	0.00871714
nystatin	A	mesothelioma-cancer	immune	21.8333	0.00257851
nystatin	A	nasopharyngeal-cancer	immune	9.35714	0.00170176
nystatin	A	oral-cancer	immune	7.86	0.00290694
nystatin	A	ovarian-cancer	immune	9.35714	0.00170176
omeprazole	A	longevity	immune	10.3421	0
omeprazole	A	adenomas-cancer	immune	10.3421	1.30625e-09
omeprazole	A	biliary-cancer	immune	7.35439	7.4556e-07
omeprazole	A	bladder-cancer	immune	4.96421	1.03251e-13
omeprazole	A	brain-cancer	immune	7.52153	0
omeprazole	A	breast-cancer	immune	5.17105	4.21885e-14
omeprazole	A	cervical-cancer	immune	12.4105	0
omeprazole	A	colon-cancer	immune	3.54586	1.20949e-10
omeprazole	A	esophageal-cancer	immune	5.06552	6.63913e-14
omeprazole	A	laryngeal-cancer	immune	4.82632	2.77753e-09
omeprazole	A	leukemia-cancer	immune	6.89474	0
omeprazole	A	liver-cancer	immune	5.28108	2.65343e-14
omeprazole	A	lung-cancer	immune	4.77328	2.42029e-13
omeprazole	A	lympha-cancer	immune	5.64115	5.9952e-15
omeprazole	A	mesothelioma-cancer	immune	6.89474	0.00567276
omeprazole	A	myeloma-cancer	immune	4.59649	0.00682114
omeprazole	A	nasopharyngeal-cancer	immune	11.8195	0
omeprazole	A	oral-cancer	immune	9.92842	0
omeprazole	A	ovarian-cancer	immune	11.8195	0
omeprazole	A	pancreatic-cancer	immune	4.59649	5.44786e-13
omeprazole	A	prostate-cancer	immune	5.51579	9.99201e-15
omeprazole	A	skin-cancer	immune	3.44737	0.00155074
omeprazole	A	stomach-cancer	immune	6.20526	6.66134e-16
ondansetron	A	longevity	immune	10.9167	0
ondansetron	A	adenomas-cancer	immune	10.9167	6.95157e-10
ondansetron	A	biliary-cancer	immune	7.76296	4.42848e-07
ondansetron	A	bladder-cancer	immune	5.24	6.21725e-15
ondansetron	A	brain-cancer	immune	7.93939	0
ondansetron	A	breast-cancer	immune	5.45833	2.55351e-15
ondansetron	A	cervical-cancer	immune	13.1	0
ondansetron	A	colon-cancer	immune	3.74286	7.97606e-12
ondansetron	A	esophageal-cancer	immune	5.34694	3.9968e-15
ondansetron	A	laryngeal-cancer	immune	5.09444	8.11368e-10
ondansetron	A	leukemia-cancer	immune	7.27778	0
ondansetron	A	liver-cancer	immune	5.57447	1.55431e-15
ondansetron	A	lung-cancer	immune	5.03846	1.46549e-14
ondansetron	A	lympha-cancer	immune	5.95455	3.33067e-16
ondansetron	A	mesothelioma-cancer	immune	7.27778	0.00482056
ondansetron	A	myeloma-cancer	immune	4.85185	0.0055263
ondansetron	A	nasopharyngeal-cancer	immune	12.4762	0
ondansetron	A	oral-cancer	immune	10.48	0
ondansetron	A	ovarian-cancer	immune	12.4762	0
ondansetron	A	pancreatic-cancer	immune	4.85185	3.33067e-14
ondansetron	A	prostate-cancer	immune	5.82222	5.55112e-16
ondansetron	A	skin-cancer	immune	3.63889	0.0010574
ondansetron	A	stomach-cancer	immune	6.55	0
pipenzolate bromide	A	longevity	immune	10.9167	0
pipenzolate bromide	A	adenomas-cancer	immune	10.9167	6.95157e-10
pipenzolate bromide	A	biliary-cancer	immune	7.76296	4.42848e-07
pipenzolate bromide	A	bladder-cancer	immune	5.24	6.21725e-15
pipenzolate bromide	A	brain-cancer	immune	7.93939	0
pipenzolate bromide	A	breast-cancer	immune	5.45833	2.55351e-15
pipenzolate bromide	A	cervical-cancer	immune	13.1	0
pipenzolate bromide	A	colon-cancer	immune	3.74286	7.97606e-12
pipenzolate bromide	A	esophageal-cancer	immune	5.34694	3.9968e-15
pipenzolate bromide	A	laryngeal-cancer	immune	5.09444	8.11368e-10
pipenzolate bromide	A	leukemia-cancer	immune	7.27778	0
pipenzolate bromide	A	liver-cancer	immune	5.57447	1.55431e-15
pipenzolate bromide	A	lung-cancer	immune	5.03846	1.46549e-14
pipenzolate bromide	A	lympha-cancer	immune	5.95455	3.33067e-16
pipenzolate bromide	A	mesothelioma-cancer	immune	7.27778	0.00482056
pipenzolate bromide	A	myeloma-cancer	immune	4.85185	0.0055263
pipenzolate bromide	A	nasopharyngeal-cancer	immune	12.4762	0
pipenzolate bromide	A	oral-cancer	immune	10.48	0
pipenzolate bromide	A	ovarian-cancer	immune	12.4762	0
pipenzolate bromide	A	pancreatic-cancer	immune	4.85185	3.33067e-14
pipenzolate bromide	A	prostate-cancer	immune	5.82222	5.55112e-16
pipenzolate bromide	A	skin-cancer	immune	3.63889	0.0010574
pipenzolate bromide	A	stomach-cancer	immune	6.55	0
propantheline bromide	A	glioma-cancer	immune	15.8788	0.00471447
riboflavin	A	longevity	immune	10.9167	0
riboflavin	A	adenomas-cancer	immune	10.9167	6.95157e-10
riboflavin	A	biliary-cancer	immune	7.76296	4.42848e-07
riboflavin	A	bladder-cancer	immune	5.24	6.21725e-15
riboflavin	A	brain-cancer	immune	7.93939	0
riboflavin	A	breast-cancer	immune	5.45833	2.55351e-15
riboflavin	A	cervical-cancer	immune	13.1	0
riboflavin	A	colon-cancer	immune	3.74286	7.97606e-12
riboflavin	A	esophageal-cancer	immune	5.34694	3.9968e-15
riboflavin	A	laryngeal-cancer	immune	5.09444	8.11368e-10
riboflavin	A	leukemia-cancer	immune	7.27778	0
riboflavin	A	liver-cancer	immune	5.57447	1.55431e-15
riboflavin	A	lung-cancer	immune	5.03846	1.46549e-14
riboflavin	A	lympha-cancer	immune	5.95455	3.33067e-16
riboflavin	A	mesothelioma-cancer	immune	7.27778	0.00482056
riboflavin	A	myeloma-cancer	immune	4.85185	0.0055263
riboflavin	A	nasopharyngeal-cancer	immune	12.4762	0
riboflavin	A	oral-cancer	immune	10.48	0
riboflavin	A	ovarian-cancer	immune	12.4762	0
riboflavin	A	pancreatic-cancer	immune	4.85185	3.33067e-14
riboflavin	A	prostate-cancer	immune	5.82222	5.55112e-16
riboflavin	A	skin-cancer	immune	3.63889	0.0010574
riboflavin	A	stomach-cancer	immune	6.55	0
succinylsulfathiazole	A	brain-cancer	immune	6.17508	8.22455e-06
succinylsulfathiazole	A	colon-cancer	immune	2.91111	0.0017101
succinylsulfathiazole	A	oral-cancer	immune	4.65778	0.00593173
succinylsulfathiazole	A	pancreatic-cancer	immune	3.23457	0.00302575
tetracycline	A	longevity	immune	10.9167	0
tetracycline	A	adenomas-cancer	immune	10.9167	6.95157e-10
tetracycline	A	biliary-cancer	immune	7.76296	4.42848e-07
tetracycline	A	bladder-cancer	immune	5.24	6.21725e-15
tetracycline	A	brain-cancer	immune	7.93939	0
tetracycline	A	breast-cancer	immune	5.45833	2.55351e-15
tetracycline	A	cervical-cancer	immune	13.1	0
tetracycline	A	colon-cancer	immune	3.74286	7.97606e-12
tetracycline	A	esophageal-cancer	immune	5.34694	3.9968e-15
tetracycline	A	laryngeal-cancer	immune	5.09444	8.11368e-10
tetracycline	A	leukemia-cancer	immune	7.27778	0
tetracycline	A	liver-cancer	immune	5.57447	1.55431e-15
tetracycline	A	lung-cancer	immune	5.03846	1.46549e-14
tetracycline	A	lympha-cancer	immune	5.95455	3.33067e-16
tetracycline	A	mesothelioma-cancer	immune	7.27778	0.00482056
tetracycline	A	myeloma-cancer	immune	4.85185	0.0055263
tetracycline	A	nasopharyngeal-cancer	immune	12.4762	0
tetracycline	A	oral-cancer	immune	10.48	0
tetracycline	A	ovarian-cancer	immune	12.4762	0
tetracycline	A	pancreatic-cancer	immune	4.85185	3.33067e-14
tetracycline	A	prostate-cancer	immune	5.82222	5.55112e-16
tetracycline	A	skin-cancer	immune	3.63889	0.0010574
tetracycline	A	stomach-cancer	immune	6.55	0
benfotiamine	A	brain-cancer	infection	6.72727	8.91425e-07
cimetidine	A	brain-cancer	infection	3.78409	6.76618e-05
cisapride	A	brain-cancer	infection	5.38182	0.00185625
doxycycline	A	brain-cancer	infection	6.72727	0.000415465
hesperetin	A	brain-cancer	infection	4.70909	7.64209e-05
lansoprazole	A	longevity	infection	8.325	0
lansoprazole	A	adenomas-cancer	infection	8.325	1.04546e-08
lansoprazole	A	biliary-cancer	infection	6.66	2.05737e-07
lansoprazole	A	bladder-cancer	infection	3.996	1.88256e-11
lansoprazole	A	brain-cancer	infection	6.05455	1.33227e-15
mepenzolate bromide	A	brain-cancer	infection	6.72727	0.000415465
metronidazole	A	brain-cancer	infection	4.13986	7.99406e-05
nadide	A	adenomas-cancer	infection	12.3333	0.00782683
nadide	A	biliary-cancer	infection	14.8	0.000252927
nystatin	A	longevity	infection	6.9375	0.00417677
omeprazole	A	longevity	infection	8.76316	0
omeprazole	A	adenomas-cancer	infection	8.76316	5.82709e-09
omeprazole	A	biliary-cancer	infection	6.23158	2.7121e-06
omeprazole	A	bladder-cancer	infection	4.20632	2.21279e-12
omeprazole	A	brain-cancer	infection	6.37321	1.11022e-16
ondansetron	A	longevity	infection	9.25	0
ondansetron	A	adenomas-cancer	infection	9.25	3.1078e-09
ondansetron	A	biliary-cancer	infection	6.57778	1.6191e-06
ondansetron	A	bladder-cancer	infection	4.44	1.36779e-13
ondansetron	A	brain-cancer	infection	6.72727	0
pipenzolate bromide	A	longevity	infection	9.25	0
pipenzolate bromide	A	adenomas-cancer	infection	9.25	3.1078e-09
pipenzolate bromide	A	biliary-cancer	infection	6.57778	1.6191e-06
pipenzolate bromide	A	bladder-cancer	infection	4.44	1.36779e-13
pipenzolate bromide	A	brain-cancer	infection	6.72727	0
riboflavin	A	longevity	infection	9.25	0
riboflavin	A	adenomas-cancer	infection	9.25	3.1078e-09
riboflavin	A	biliary-cancer	infection	6.57778	1.6191e-06
riboflavin	A	bladder-cancer	infection	4.44	1.36779e-13
riboflavin	A	brain-cancer	infection	6.72727	0
succinylsulfathiazole	A	brain-cancer	infection	5.23232	2.56525e-05
tetracycline	A	longevity	infection	9.25	0
tetracycline	A	adenomas-cancer	infection	9.25	3.1078e-09
tetracycline	A	biliary-cancer	infection	6.57778	1.6191e-06
tetracycline	A	bladder-cancer	infection	4.44	1.36779e-13
tetracycline	A	brain-cancer	infection	6.72727	0
lansoprazole	A	longevity	kidney	8.2875	0
lansoprazole	A	adenomas-cancer	kidney	8.2875	1.08888e-08
lansoprazole	A	biliary-cancer	kidney	6.63	2.14129e-07
lansoprazole	A	bladder-cancer	kidney	3.978	2.04513e-11
nadide	A	adenomas-cancer	kidney	12.2778	0.00789686
nadide	A	biliary-cancer	kidney	14.7333	0.000256391
nystatin	A	longevity	kidney	6.90625	0.00423248
omeprazole	A	longevity	kidney	8.72368	0
omeprazole	A	adenomas-cancer	kidney	8.72368	6.06948e-09
omeprazole	A	biliary-cancer	kidney	6.20351	2.80897e-06
omeprazole	A	bladder-cancer	kidney	4.18737	2.40596e-12
ondansetron	A	longevity	kidney	9.20833	0
ondansetron	A	adenomas-cancer	kidney	9.20833	3.23729e-09
ondansetron	A	biliary-cancer	kidney	6.54815	1.67718e-06
ondansetron	A	bladder-cancer	kidney	4.42	1.48881e-13
pipenzolate bromide	A	longevity	kidney	9.20833	0
pipenzolate bromide	A	adenomas-cancer	kidney	9.20833	3.23729e-09
pipenzolate bromide	A	biliary-cancer	kidney	6.54815	1.67718e-06
pipenzolate bromide	A	bladder-cancer	kidney	4.42	1.48881e-13
riboflavin	A	longevity	kidney	9.20833	0
riboflavin	A	adenomas-cancer	kidney	9.20833	3.23729e-09
riboflavin	A	biliary-cancer	kidney	6.54815	1.67718e-06
riboflavin	A	bladder-cancer	kidney	4.42	1.48881e-13
tetracycline	A	longevity	kidney	9.20833	0
tetracycline	A	adenomas-cancer	kidney	9.20833	3.23729e-09
tetracycline	A	biliary-cancer	kidney	6.54815	1.67718e-06
tetracycline	A	bladder-cancer	kidney	4.42	1.48881e-13
benfotiamine	A	brain-cancer	metabolic	8.63636	1.51845e-07
cimetidine	A	brain-cancer	metabolic	4.85795	8.25289e-06
cisapride	A	brain-cancer	metabolic	6.90909	0.000697421
doxycycline	A	brain-cancer	metabolic	8.63636	0.000152037
hesperetin	A	brain-cancer	metabolic	6.04545	1.40975e-05
lansoprazole	A	longevity	metabolic	10.6875	0
lansoprazole	A	adenomas-cancer	metabolic	10.6875	1.10018e-09
lansoprazole	A	biliary-cancer	metabolic	8.55	2.24019e-08
lansoprazole	A	bladder-cancer	metabolic	5.13	1.93956e-13
lansoprazole	A	brain-cancer	metabolic	7.77273	0
lansoprazole	A	breast-cancer	metabolic	5.64062	1.11022e-15
mepenzolate bromide	A	brain-cancer	metabolic	8.63636	0.000152037
metronidazole	A	brain-cancer	metabolic	5.31469	1.20091e-05
nadide	A	adenomas-cancer	metabolic	15.8333	0.00477726
nadide	A	biliary-cancer	metabolic	19	0.000119183
nystatin	A	longevity	metabolic	8.90625	0.00200222
nystatin	A	adenomas-cancer	metabolic	11.875	0.00932953
nystatin	A	brain-cancer	metabolic	6.47727	0.00526047
omeprazole	A	longevity	metabolic	11.25	0
omeprazole	A	adenomas-cancer	metabolic	11.25	6.11278e-10
omeprazole	A	biliary-cancer	metabolic	8	3.86001e-07
omeprazole	A	bladder-cancer	metabolic	5.4	2.18714e-14
omeprazole	A	brain-cancer	metabolic	8.18182	0
omeprazole	A	breast-cancer	metabolic	5.625	8.88178e-15
ondansetron	A	longevity	metabolic	11.875	0
ondansetron	A	adenomas-cancer	metabolic	11.875	3.24999e-10
ondansetron	A	biliary-cancer	metabolic	8.44444	2.28769e-07
ondansetron	A	bladder-cancer	metabolic	5.7	1.33227e-15
ondansetron	A	brain-cancer	metabolic	8.63636	0
ondansetron	A	breast-cancer	metabolic	5.9375	5.55112e-16
pipenzolate bromide	A	longevity	metabolic	11.875	0
pipenzolate bromide	A	adenomas-cancer	metabolic	11.875	3.24999e-10
pipenzolate bromide	A	biliary-cancer	metabolic	8.44444	2.28769e-07
pipenzolate bromide	A	bladder-cancer	metabolic	5.7	1.33227e-15
pipenzolate bromide	A	brain-cancer	metabolic	8.63636	0
pipenzolate bromide	A	breast-cancer	metabolic	5.9375	5.55112e-16
riboflavin	A	longevity	metabolic	11.875	0
riboflavin	A	adenomas-cancer	metabolic	11.875	3.24999e-10
riboflavin	A	biliary-cancer	metabolic	8.44444	2.28769e-07
riboflavin	A	bladder-cancer	metabolic	5.7	1.33227e-15
riboflavin	A	brain-cancer	metabolic	8.63636	0
riboflavin	A	breast-cancer	metabolic	5.9375	5.55112e-16
succinylsulfathiazole	A	brain-cancer	metabolic	6.71717	4.60761e-06
tetracycline	A	longevity	metabolic	11.875	0
tetracycline	A	adenomas-cancer	metabolic	11.875	3.24999e-10
tetracycline	A	biliary-cancer	metabolic	8.44444	2.28769e-07
tetracycline	A	bladder-cancer	metabolic	5.7	1.33227e-15
tetracycline	A	brain-cancer	metabolic	8.63636	0
tetracycline	A	breast-cancer	metabolic	5.9375	5.55112e-16
acetohexamide	A	lung-cancer	neurological	5.21154	0.000221437
benfluorex	A	glioma-cancer	neurological	11.2917	0.00949868
benfotiamine	A	brain-cancer	neurological	8.21212	2.16874e-07
benfotiamine	A	colon-cancer	neurological	3.87143	6.08568e-05
carbenoxolone	A	lympha-cancer	neurological	4.10606	0.00717952
chlorpropamide	A	glioma-cancer	neurological	90.3333	8.20008e-05
cimetidine	A	brain-cancer	neurological	4.61932	1.26575e-05
cisapride	A	brain-cancer	neurological	6.5697	0.000850001
cisapride	A	lung-cancer	neurological	4.16923	0.00527296
doxycycline	A	brain-cancer	neurological	8.21212	0.000186177
doxycycline	A	colon-cancer	neurological	3.87143	0.00417168
doxycycline	A	lung-cancer	neurological	5.21154	0.00123174
hesperetin	A	brain-cancer	neurological	5.74848	1.98497e-05
hesperetin	A	colon-cancer	neurological	2.71	0.00361983
lansoprazole	A	longevity	neurological	10.1625	0
lansoprazole	A	adenomas-cancer	neurological	10.1625	1.73233e-09
lansoprazole	A	biliary-cancer	neurological	8.13	3.50585e-08
lansoprazole	A	bladder-cancer	neurological	4.878	4.87277e-13
lansoprazole	A	brain-cancer	neurological	7.39091	0
lansoprazole	A	breast-cancer	neurological	5.36354	2.88658e-15
lansoprazole	A	cervical-cancer	neurological	12.8725	0
lansoprazole	A	colon-cancer	neurological	3.67786	1.41299e-11
lansoprazole	A	esophageal-cancer	neurological	4.97755	3.14526e-13
lansoprazole	A	laryngeal-cancer	neurological	4.7425	5.25467e-09
lansoprazole	A	leukemia-cancer	neurological	6.775	2.22045e-16
lansoprazole	A	liver-cancer	neurological	5.18936	1.26454e-13
lansoprazole	A	lung-cancer	neurological	4.69038	1.13221e-12
lansoprazole	A	lympha-cancer	neurological	5.54318	2.91989e-14
lansoprazole	A	mesothelioma-cancer	neurological	6.775	0.0060051
lansoprazole	A	myeloma-cancer	neurological	4.51667	0.00735601
mepenzolate bromide	A	brain-cancer	neurological	8.21212	0.000186177
mepenzolate bromide	A	colon-cancer	neurological	3.87143	0.00417168
mepenzolate bromide	A	lung-cancer	neurological	5.21154	0.00123174
metronidazole	A	brain-cancer	neurological	5.05361	1.76428e-05
metronidazole	A	colon-cancer	neurological	2.68022	0.000954734
metronidazole	A	lung-cancer	neurological	2.80621	0.00441791
nadide	A	adenomas-cancer	neurological	15.0556	0.00527793
nadide	A	biliary-cancer	neurological	18.0667	0.0001387
nystatin	A	longevity	neurological	8.46875	0.00232291
nystatin	A	brain-cancer	neurological	6.15909	0.0060942
nystatin	A	cervical-cancer	neurological	10.1625	0.00132392
nystatin	A	leukemia-cancer	neurological	5.64583	0.00790209
nystatin	A	mesothelioma-cancer	neurological	22.5833	0.00241146
omeprazole	A	longevity	neurological	10.6974	0
omeprazole	A	adenomas-cancer	neurological	10.6974	9.6305e-10
omeprazole	A	biliary-cancer	neurological	7.60702	5.72541e-07
omeprazole	A	bladder-cancer	neurological	5.13474	5.54001e-14
omeprazole	A	brain-cancer	neurological	7.7799	0
omeprazole	A	breast-cancer	neurological	5.34868	2.26485e-14
omeprazole	A	cervical-cancer	neurological	12.8368	0
omeprazole	A	colon-cancer	neurological	3.66767	6.51117e-11
omeprazole	A	esophageal-cancer	neurological	5.23953	3.56382e-14
omeprazole	A	laryngeal-cancer	neurological	4.99211	1.74367e-09
omeprazole	A	leukemia-cancer	neurological	7.13158	0
omeprazole	A	liver-cancer	neurological	5.46249	1.42109e-14
omeprazole	A	lung-cancer	neurological	4.93725	1.29785e-13
omeprazole	A	lympha-cancer	neurological	5.83493	3.21965e-15
omeprazole	A	mesothelioma-cancer	neurological	7.13158	0.00514929
omeprazole	A	myeloma-cancer	neurological	4.75439	0.00603393
ondansetron	A	longevity	neurological	11.2917	0
ondansetron	A	adenomas-cancer	neurological	11.2917	5.12313e-10
ondansetron	A	biliary-cancer	neurological	8.02963	3.39766e-07
ondansetron	A	bladder-cancer	neurological	5.42	3.33067e-15
ondansetron	A	brain-cancer	neurological	8.21212	0
ondansetron	A	breast-cancer	neurological	5.64583	1.33227e-15
ondansetron	A	cervical-cancer	neurological	13.55	0
ondansetron	A	colon-cancer	neurological	3.87143	4.2556e-12
ondansetron	A	esophageal-cancer	neurological	5.53061	2.10942e-15
ondansetron	A	laryngeal-cancer	neurological	5.26944	5.07379e-10
ondansetron	A	leukemia-cancer	neurological	7.52778	0
ondansetron	A	liver-cancer	neurological	5.76596	8.88178e-16
ondansetron	A	lung-cancer	neurological	5.21154	7.88258e-15
ondansetron	A	lympha-cancer	neurological	6.15909	2.22045e-16
ondansetron	A	mesothelioma-cancer	neurological	7.52778	0.00437434
ondansetron	A	myeloma-cancer	neurological	5.01852	0.00488409
pipenzolate bromide	A	longevity	neurological	11.2917	0
pipenzolate bromide	A	adenomas-cancer	neurological	11.2917	5.12313e-10
pipenzolate bromide	A	biliary-cancer	neurological	8.02963	3.39766e-07
pipenzolate bromide	A	bladder-cancer	neurological	5.42	3.33067e-15
pipenzolate bromide	A	brain-cancer	neurological	8.21212	0
pipenzolate bromide	A	breast-cancer	neurological	5.64583	1.33227e-15
pipenzolate bromide	A	cervical-cancer	neurological	13.55	0
pipenzolate bromide	A	colon-cancer	neurological	3.87143	4.2556e-12
pipenzolate bromide	A	esophageal-cancer	neurological	5.53061	2.10942e-15
pipenzolate bromide	A	laryngeal-cancer	neurological	5.26944	5.07379e-10
pipenzolate bromide	A	leukemia-cancer	neurological	7.52778	0
pipenzolate bromide	A	liver-cancer	neurological	5.76596	8.88178e-16
pipenzolate bromide	A	lung-cancer	neurological	5.21154	7.88258e-15
pipenzolate bromide	A	lympha-cancer	neurological	6.15909	2.22045e-16
pipenzolate bromide	A	mesothelioma-cancer	neurological	7.52778	0.00437434
pipenzolate bromide	A	myeloma-cancer	neurological	5.01852	0.00488409
propantheline bromide	A	glioma-cancer	neurological	16.4242	0.00440945
riboflavin	A	longevity	neurological	11.2917	0
riboflavin	A	adenomas-cancer	neurological	11.2917	5.12313e-10
riboflavin	A	biliary-cancer	neurological	8.02963	3.39766e-07
riboflavin	A	bladder-cancer	neurological	5.42	3.33067e-15
riboflavin	A	brain-cancer	neurological	8.21212	0
riboflavin	A	breast-cancer	neurological	5.64583	1.33227e-15
riboflavin	A	cervical-cancer	neurological	13.55	0
riboflavin	A	colon-cancer	neurological	3.87143	4.2556e-12
riboflavin	A	esophageal-cancer	neurological	5.53061	2.10942e-15
riboflavin	A	laryngeal-cancer	neurological	5.26944	5.07379e-10
riboflavin	A	leukemia-cancer	neurological	7.52778	0
riboflavin	A	liver-cancer	neurological	5.76596	8.88178e-16
riboflavin	A	lung-cancer	neurological	5.21154	7.88258e-15
riboflavin	A	lympha-cancer	neurological	6.15909	2.22045e-16
riboflavin	A	mesothelioma-cancer	neurological	7.52778	0.00437434
riboflavin	A	myeloma-cancer	neurological	5.01852	0.00488409
succinylsulfathiazole	A	brain-cancer	neurological	6.38721	6.51871e-06
succinylsulfathiazole	A	colon-cancer	neurological	3.01111	0.00137178
tetracycline	A	longevity	neurological	11.2917	0
tetracycline	A	adenomas-cancer	neurological	11.2917	5.12313e-10
tetracycline	A	biliary-cancer	neurological	8.02963	3.39766e-07
tetracycline	A	bladder-cancer	neurological	5.42	3.33067e-15
tetracycline	A	brain-cancer	neurological	8.21212	0
tetracycline	A	breast-cancer	neurological	5.64583	1.33227e-15
tetracycline	A	cervical-cancer	neurological	13.55	0
tetracycline	A	colon-cancer	neurological	3.87143	4.2556e-12
tetracycline	A	esophageal-cancer	neurological	5.53061	2.10942e-15
tetracycline	A	laryngeal-cancer	neurological	5.26944	5.07379e-10
tetracycline	A	leukemia-cancer	neurological	7.52778	0
tetracycline	A	liver-cancer	neurological	5.76596	8.88178e-16
tetracycline	A	lung-cancer	neurological	5.21154	7.88258e-15
tetracycline	A	lympha-cancer	neurological	6.15909	2.22045e-16
tetracycline	A	mesothelioma-cancer	neurological	7.52778	0.00437434
tetracycline	A	myeloma-cancer	neurological	5.01852	0.00488409
lansoprazole	A	longevity	normal variation	8.4375	0
lansoprazole	A	adenomas-cancer	normal variation	8.4375	9.26333e-09
lansoprazole	A	biliary-cancer	normal variation	6.75	1.82676e-07
lansoprazole	A	bladder-cancer	normal variation	4.05	1.47167e-11
nadide	A	adenomas-cancer	normal variation	12.5	0.00762225
nadide	A	biliary-cancer	normal variation	15	0.0002429
nystatin	A	longevity	normal variation	7.03125	0.00401539
omeprazole	A	longevity	normal variation	8.88158	0
omeprazole	A	adenomas-cancer	normal variation	8.88158	5.1621e-09
omeprazole	A	biliary-cancer	normal variation	6.31579	2.44331e-06
omeprazole	A	bladder-cancer	normal variation	4.26316	1.7254e-12
ondansetron	A	longevity	normal variation	9.375	0
ondansetron	A	adenomas-cancer	normal variation	9.375	2.75261e-09
ondansetron	A	biliary-cancer	normal variation	6.66667	1.45798e-06
ondansetron	A	bladder-cancer	normal variation	4.5	1.06359e-13
pipenzolate bromide	A	longevity	normal variation	9.375	0
pipenzolate bromide	A	adenomas-cancer	normal variation	9.375	2.75261e-09
pipenzolate bromide	A	biliary-cancer	normal variation	6.66667	1.45798e-06
pipenzolate bromide	A	bladder-cancer	normal variation	4.5	1.06359e-13
riboflavin	A	longevity	normal variation	9.375	0
riboflavin	A	adenomas-cancer	normal variation	9.375	2.75261e-09
riboflavin	A	biliary-cancer	normal variation	6.66667	1.45798e-06
riboflavin	A	bladder-cancer	normal variation	4.5	1.06359e-13
tetracycline	A	longevity	normal variation	9.375	0
tetracycline	A	adenomas-cancer	normal variation	9.375	2.75261e-09
tetracycline	A	biliary-cancer	normal variation	6.66667	1.45798e-06
tetracycline	A	bladder-cancer	normal variation	4.5	1.06359e-13
lansoprazole	A	longevity	pharmacogenomic	8.9625	0
lansoprazole	A	adenomas-cancer	pharmacogenomic	8.9625	5.37636e-09
lansoprazole	A	biliary-cancer	pharmacogenomic	7.17	1.06984e-07
nadide	A	adenomas-cancer	pharmacogenomic	13.2778	0.00676595
nadide	A	biliary-cancer	pharmacogenomic	15.9333	0.000202507
nystatin	A	longevity	pharmacogenomic	7.46875	0.00336281
omeprazole	A	longevity	pharmacogenomic	9.43421	0
omeprazole	A	adenomas-cancer	pharmacogenomic	9.43421	2.99354e-09
omeprazole	A	biliary-cancer	pharmacogenomic	6.70877	1.52716e-06
ondansetron	A	longevity	pharmacogenomic	9.95833	0
ondansetron	A	adenomas-cancer	pharmacogenomic	9.95833	1.59494e-09
ondansetron	A	biliary-cancer	pharmacogenomic	7.08148	9.09542e-07
pipenzolate bromide	A	longevity	pharmacogenomic	9.95833	0
pipenzolate bromide	A	adenomas-cancer	pharmacogenomic	9.95833	1.59494e-09
pipenzolate bromide	A	biliary-cancer	pharmacogenomic	7.08148	9.09542e-07
riboflavin	A	longevity	pharmacogenomic	9.95833	0
riboflavin	A	adenomas-cancer	pharmacogenomic	9.95833	1.59494e-09
riboflavin	A	biliary-cancer	pharmacogenomic	7.08148	9.09542e-07
tetracycline	A	longevity	pharmacogenomic	9.95833	0
tetracycline	A	adenomas-cancer	pharmacogenomic	9.95833	1.59494e-09
tetracycline	A	biliary-cancer	pharmacogenomic	7.08148	9.09542e-07
benfotiamine	A	brain-cancer	Psychological	7.0303	6.5213e-07
cimetidine	A	brain-cancer	Psychological	3.95455	4.68429e-05
cisapride	A	brain-cancer	Psychological	5.62424	0.0015626
doxycycline	A	brain-cancer	Psychological	7.0303	0.000347923
hesperetin	A	brain-cancer	Psychological	4.92121	5.6797e-05
lansoprazole	A	longevity	Psychological	8.7	0
lansoprazole	A	adenomas-cancer	Psychological	8.7	7.02823e-09
lansoprazole	A	biliary-cancer	Psychological	6.96	1.39246e-07
lansoprazole	A	bladder-cancer	Psychological	4.176	8.39073e-12
lansoprazole	A	brain-cancer	Psychological	6.32727	5.55112e-16
lansoprazole	A	breast-cancer	Psychological	4.59167	5.92859e-14
lansoprazole	A	cervical-cancer	Psychological	11.02	0
mepenzolate bromide	A	brain-cancer	Psychological	7.0303	0.000347923
metronidazole	A	brain-cancer	Psychological	4.32634	5.73583e-05
nadide	A	adenomas-cancer	Psychological	12.8889	0.00717498
nadide	A	biliary-cancer	Psychological	15.4667	0.00022148
nystatin	A	longevity	Psychological	7.25	0.00366984
nystatin	A	brain-cancer	Psychological	5.27273	0.00957949
nystatin	A	cervical-cancer	Psychological	8.7	0.00209609
omeprazole	A	longevity	Psychological	9.15789	0
omeprazole	A	adenomas-cancer	Psychological	9.15789	3.91487e-09
omeprazole	A	biliary-cancer	Psychological	6.51228	1.92506e-06
omeprazole	A	bladder-cancer	Psychological	4.39579	9.78218e-13
omeprazole	A	brain-cancer	Psychological	6.66029	1.11022e-16
omeprazole	A	breast-cancer	Psychological	4.57895	4.00124e-13
omeprazole	A	cervical-cancer	Psychological	10.9895	0
ondansetron	A	longevity	Psychological	9.66667	0
ondansetron	A	adenomas-cancer	Psychological	9.66667	2.08665e-09
ondansetron	A	biliary-cancer	Psychological	6.87407	1.14759e-06
ondansetron	A	bladder-cancer	Psychological	4.64	5.9952e-14
ondansetron	A	brain-cancer	Psychological	7.0303	0
ondansetron	A	breast-cancer	Psychological	4.83333	2.43139e-14
ondansetron	A	cervical-cancer	Psychological	11.6	0
pipenzolate bromide	A	longevity	Psychological	9.66667	0
pipenzolate bromide	A	adenomas-cancer	Psychological	9.66667	2.08665e-09
pipenzolate bromide	A	biliary-cancer	Psychological	6.87407	1.14759e-06
pipenzolate bromide	A	bladder-cancer	Psychological	4.64	5.9952e-14
pipenzolate bromide	A	brain-cancer	Psychological	7.0303	0
pipenzolate bromide	A	breast-cancer	Psychological	4.83333	2.43139e-14
pipenzolate bromide	A	cervical-cancer	Psychological	11.6	0
riboflavin	A	longevity	Psychological	9.66667	0
riboflavin	A	adenomas-cancer	Psychological	9.66667	2.08665e-09
riboflavin	A	biliary-cancer	Psychological	6.87407	1.14759e-06
riboflavin	A	bladder-cancer	Psychological	4.64	5.9952e-14
riboflavin	A	brain-cancer	Psychological	7.0303	0
riboflavin	A	breast-cancer	Psychological	4.83333	2.43139e-14
riboflavin	A	cervical-cancer	Psychological	11.6	0
succinylsulfathiazole	A	brain-cancer	Psychological	5.46801	1.89647e-05
tetracycline	A	longevity	Psychological	9.66667	0
tetracycline	A	adenomas-cancer	Psychological	9.66667	2.08665e-09
tetracycline	A	biliary-cancer	Psychological	6.87407	1.14759e-06
tetracycline	A	bladder-cancer	Psychological	4.64	5.9952e-14
tetracycline	A	brain-cancer	Psychological	7.0303	0
tetracycline	A	breast-cancer	Psychological	4.83333	2.43139e-14
tetracycline	A	cervical-cancer	Psychological	11.6	0
benfotiamine	A	brain-cancer	reproduction	6.72727	8.91425e-07
cimetidine	A	brain-cancer	reproduction	3.78409	6.76618e-05
cisapride	A	brain-cancer	reproduction	5.38182	0.00185625
doxycycline	A	brain-cancer	reproduction	6.72727	0.000415465
hesperetin	A	brain-cancer	reproduction	4.70909	7.64209e-05
lansoprazole	A	longevity	reproduction	8.325	0
lansoprazole	A	adenomas-cancer	reproduction	8.325	1.04546e-08
lansoprazole	A	biliary-cancer	reproduction	6.66	2.05737e-07
lansoprazole	A	bladder-cancer	reproduction	3.996	1.88256e-11
lansoprazole	A	brain-cancer	reproduction	6.05455	1.33227e-15
lansoprazole	A	breast-cancer	reproduction	4.39375	1.40776e-13
mepenzolate bromide	A	brain-cancer	reproduction	6.72727	0.000415465
metronidazole	A	brain-cancer	reproduction	4.13986	7.99406e-05
nadide	A	adenomas-cancer	reproduction	12.3333	0.00782683
nadide	A	biliary-cancer	reproduction	14.8	0.000252927
nystatin	A	longevity	reproduction	6.9375	0.00417677
omeprazole	A	longevity	reproduction	8.76316	0
omeprazole	A	adenomas-cancer	reproduction	8.76316	5.82709e-09
omeprazole	A	biliary-cancer	reproduction	6.23158	2.7121e-06
omeprazole	A	bladder-cancer	reproduction	4.20632	2.21279e-12
omeprazole	A	brain-cancer	reproduction	6.37321	1.11022e-16
omeprazole	A	breast-cancer	reproduction	4.38158	9.0572e-13
ondansetron	A	longevity	reproduction	9.25	0
ondansetron	A	adenomas-cancer	reproduction	9.25	3.1078e-09
ondansetron	A	biliary-cancer	reproduction	6.57778	1.6191e-06
ondansetron	A	bladder-cancer	reproduction	4.44	1.36779e-13
ondansetron	A	brain-cancer	reproduction	6.72727	0
ondansetron	A	breast-cancer	reproduction	4.625	5.54001e-14
pipenzolate bromide	A	longevity	reproduction	9.25	0
pipenzolate bromide	A	adenomas-cancer	reproduction	9.25	3.1078e-09
pipenzolate bromide	A	biliary-cancer	reproduction	6.57778	1.6191e-06
pipenzolate bromide	A	bladder-cancer	reproduction	4.44	1.36779e-13
pipenzolate bromide	A	brain-cancer	reproduction	6.72727	0
pipenzolate bromide	A	breast-cancer	reproduction	4.625	5.54001e-14
riboflavin	A	longevity	reproduction	9.25	0
riboflavin	A	adenomas-cancer	reproduction	9.25	3.1078e-09
riboflavin	A	biliary-cancer	reproduction	6.57778	1.6191e-06
riboflavin	A	bladder-cancer	reproduction	4.44	1.36779e-13
riboflavin	A	brain-cancer	reproduction	6.72727	0
riboflavin	A	breast-cancer	reproduction	4.625	5.54001e-14
succinylsulfathiazole	A	brain-cancer	reproduction	5.23232	2.56525e-05
tetracycline	A	longevity	reproduction	9.25	0
tetracycline	A	adenomas-cancer	reproduction	9.25	3.1078e-09
tetracycline	A	biliary-cancer	reproduction	6.57778	1.6191e-06
tetracycline	A	bladder-cancer	reproduction	4.44	1.36779e-13
tetracycline	A	brain-cancer	reproduction	6.72727	0
tetracycline	A	breast-cancer	reproduction	4.625	5.54001e-14
lansoprazole	A	longevity	vision	7.725	0
nystatin	A	longevity	vision	6.4375	0.00520111
omeprazole	A	longevity	vision	8.13158	0
ondansetron	A	longevity	vision	8.58333	0
pipenzolate bromide	A	longevity	vision	8.58333	0
riboflavin	A	longevity	vision	8.58333	0
tetracycline	A	longevity	vision	8.58333	0
acetohexamide	B	lung-cancer	cancer	2.82692	0.00486681
benfotiamine	B	brain-cancer	cancer	4.45455	1.67812e-05
benfotiamine	B	colon-cancer	cancer	2.1	0.00470895
acetohexamide	B	lung-cancer	cardiovascular	2.98077	0.00372063
benfotiamine	B	brain-cancer	cardiovascular	4.69697	1.14928e-05
benfotiamine	B	colon-cancer	cardiovascular	2.21429	0.00322497
benfotiamine	B	pancreatic-cancer	cardiovascular	2.46032	0.00749401
benfotiamine	B	brain-cancer	hematological	2.9697	0.000308799
acetohexamide	B	lung-cancer	immune	2.67308	0.00646389
benfotiamine	B	brain-cancer	immune	4.21212	2.50394e-05
benfotiamine	B	colon-cancer	immune	1.98571	0.00702627
benfotiamine	B	brain-cancer	infection	2.69697	0.000620012
benfotiamine	B	brain-cancer	metabolic	6.0303	1.93835e-06
acetohexamide	B	lung-cancer	neurological	3.09615	0.0030696
benfotiamine	B	brain-cancer	neurological	4.87879	8.76417e-06
benfotiamine	B	colon-cancer	neurological	2.3	0.0024593
benfotiamine	B	brain-cancer	Psychological	3.09091	0.000231335
benfotiamine	B	brain-cancer	reproduction	3.0303	0.000266877
lansoprazole	C	longevity	aging	9.9	0
nystatin	C	longevity	aging	8.25	0.00250917
omeprazole	C	longevity	aging	10.4211	0
ondansetron	C	longevity	aging	11	0
pipenzolate bromide	C	longevity	aging	11	0
riboflavin	C	longevity	aging	11	0
tetracycline	C	longevity	aging	11	0
dipyridamole	C	longevity	aging	9	4.31204e-09
raubasine	C	longevity	aging	11	0
acetohexamide	C	lung-cancer	cancer	5.67308	0.000144434
benfluorex	C	glioma-cancer	cancer	12.2917	0.00803718
benfotiamine	C	brain-cancer	cancer	8.93939	1.18976e-07
benfotiamine	C	colon-cancer	cancer	4.21429	3.33856e-05
benfotiamine	C	oral-cancer	cancer	6.74286	0.00119799
benfotiamine	C	pancreatic-cancer	cancer	4.68254	0.000178279
carbenoxolone	C	lympha-cancer	cancer	4.4697	0.00521874
chlorhexidine	C	lung-cancer	cancer	2.38866	0.0087143
chlorpropamide	C	glioma-cancer	cancer	98.3333	6.91802e-05
cimetidine	C	brain-cancer	cancer	5.02841	6.15258e-06
cisapride	C	brain-cancer	cancer	7.15152	0.000608996
cisapride	C	lung-cancer	cancer	4.53846	0.00380041
cisapride	C	oral-cancer	cancer	9.44	0.000192764
cisapride	C	pancreatic-cancer	cancer	4.37037	0.00441138
doxycycline	C	brain-cancer	cancer	8.93939	0.000132351
doxycycline	C	colon-cancer	cancer	4.21429	0.00296559
doxycycline	C	lung-cancer	cancer	5.67308	0.000875628
doxycycline	C	oral-cancer	cancer	11.8	4.09149e-05
doxycycline	C	pancreatic-cancer	cancer	5.46296	0.00102288
hesperetin	C	brain-cancer	cancer	6.25758	1.11491e-05
hesperetin	C	colon-cancer	cancer	2.95	0.00211928
hesperetin	C	oral-cancer	cancer	4.72	0.00601267
hesperetin	C	pancreatic-cancer	cancer	3.27778	0.00337593
lansoprazole	C	longevity	cancer	11.0625	0
lansoprazole	C	adenomas-cancer	cancer	11.0625	8.06265e-10
lansoprazole	C	biliary-cancer	cancer	8.85	1.64828e-08
lansoprazole	C	bladder-cancer	cancer	5.31	1.03251e-13
lansoprazole	C	brain-cancer	cancer	8.04545	0
lansoprazole	C	breast-cancer	cancer	5.83854	5.55112e-16
lansoprazole	C	cervical-cancer	cancer	14.0125	0
lansoprazole	C	colon-cancer	cancer	4.00357	2.72593e-12
lansoprazole	C	esophageal-cancer	cancer	5.41837	6.66134e-14
lansoprazole	C	laryngeal-cancer	cancer	5.1625	1.6437e-09
lansoprazole	C	leukemia-cancer	cancer	7.375	1.11022e-16
lansoprazole	C	liver-cancer	cancer	5.64894	2.67564e-14
lansoprazole	C	lung-cancer	cancer	5.10577	2.40252e-13
lansoprazole	C	lympha-cancer	cancer	6.03409	6.21725e-15
lansoprazole	C	mesothelioma-cancer	cancer	7.375	0.0047087
lansoprazole	C	myeloma-cancer	cancer	4.91667	0.00540658
lansoprazole	C	nasopharyngeal-cancer	cancer	12.6429	0
lansoprazole	C	oral-cancer	cancer	10.62	0
lansoprazole	C	ovarian-cancer	cancer	12.6429	0
lansoprazole	C	pancreatic-cancer	cancer	4.91667	5.37348e-13
lansoprazole	C	prostate-cancer	cancer	6.22778	1.11022e-16
lansoprazole	C	skin-cancer	cancer	3.6875	0.00107378
mepenzolate bromide	C	brain-cancer	cancer	8.93939	0.000132351
mepenzolate bromide	C	colon-cancer	cancer	4.21429	0.00296559
mepenzolate bromide	C	lung-cancer	cancer	5.67308	0.000875628
mepenzolate bromide	C	oral-cancer	cancer	11.8	4.09149e-05
mepenzolate bromide	C	pancreatic-cancer	cancer	5.46296	0.00102288
metronidazole	C	brain-cancer	cancer	5.50117	9.22291e-06
metronidazole	C	colon-cancer	cancer	2.91758	0.000480472
metronidazole	C	lung-cancer	cancer	3.05473	0.00264401
metronidazole	C	oral-cancer	cancer	4.53846	0.00236217
metronidazole	C	pancreatic-cancer	cancer	3.36182	0.000479625
nadide	C	adenomas-cancer	cancer	16.3889	0.00446201
nadide	C	biliary-cancer	cancer	19.6667	0.00010743
nystatin	C	longevity	cancer	9.21875	0.00180844
nystatin	C	adenomas-cancer	cancer	12.2917	0.00872104
nystatin	C	brain-cancer	cancer	6.70455	0.00475581
nystatin	C	cervical-cancer	cancer	11.0625	0.00102965
nystatin	C	laryngeal-cancer	cancer	5.53125	0.00844429
nystatin	C	leukemia-cancer	cancer	6.14583	0.00617174
nystatin	C	mesothelioma-cancer	cancer	24.5833	0.00203777
nystatin	C	myeloma-cancer	cancer	12.2917	0.00872104
nystatin	C	nasopharyngeal-cancer	cancer	10.5357	0.00119803
nystatin	C	oral-cancer	cancer	8.85	0.00204947
nystatin	C	ovarian-cancer	cancer	10.5357	0.00119803
omeprazole	C	longevity	cancer	11.6447	0
omeprazole	C	adenomas-cancer	cancer	11.6447	4.47808e-10
omeprazole	C	biliary-cancer	cancer	8.2807	2.94604e-07
omeprazole	C	bladder-cancer	cancer	5.58947	1.15463e-14
omeprazole	C	brain-cancer	cancer	8.4689	0
omeprazole	C	breast-cancer	cancer	5.82237	4.77396e-15
omeprazole	C	cervical-cancer	cancer	13.9737	0
omeprazole	C	colon-cancer	cancer	3.99248	1.37563e-11
omeprazole	C	esophageal-cancer	cancer	5.70354	7.43849e-15
omeprazole	C	laryngeal-cancer	cancer	5.43421	5.40464e-10
omeprazole	C	leukemia-cancer	cancer	7.76316	0
omeprazole	C	liver-cancer	cancer	5.94625	2.9976e-15
omeprazole	C	lung-cancer	cancer	5.37449	2.72005e-14
omeprazole	C	lympha-cancer	cancer	6.35167	6.66134e-16
omeprazole	C	mesothelioma-cancer	cancer	7.76316	0.00403462
omeprazole	C	myeloma-cancer	cancer	5.17544	0.00442537
omeprazole	C	nasopharyngeal-cancer	cancer	13.3083	0
omeprazole	C	oral-cancer	cancer	11.1789	0
omeprazole	C	ovarian-cancer	cancer	13.3083	0
omeprazole	C	pancreatic-cancer	cancer	5.17544	6.12843e-14
omeprazole	C	prostate-cancer	cancer	6.21053	1.11022e-15
omeprazole	C	skin-cancer	cancer	3.88158	0.000746688
ondansetron	C	longevity	cancer	12.2917	0
ondansetron	C	adenomas-cancer	cancer	12.2917	2.37999e-10
ondansetron	C	biliary-cancer	cancer	8.74074	1.74453e-07
ondansetron	C	bladder-cancer	cancer	5.9	6.66134e-16
ondansetron	C	brain-cancer	cancer	8.93939	0
ondansetron	C	breast-cancer	cancer	6.14583	2.22045e-16
ondansetron	C	cervical-cancer	cancer	14.75	0
ondansetron	C	colon-cancer	cancer	4.21429	8.80629e-13
ondansetron	C	esophageal-cancer	cancer	6.02041	4.44089e-16
ondansetron	C	laryngeal-cancer	cancer	5.73611	1.55843e-10
ondansetron	C	leukemia-cancer	cancer	8.19444	0
ondansetron	C	liver-cancer	cancer	6.2766	2.22045e-16
ondansetron	C	lung-cancer	cancer	5.67308	1.66533e-15
ondansetron	C	lympha-cancer	cancer	6.70455	0
ondansetron	C	mesothelioma-cancer	cancer	8.19444	0.00342487
ondansetron	C	myeloma-cancer	cancer	5.46296	0.00357442
ondansetron	C	nasopharyngeal-cancer	cancer	14.0476	0
ondansetron	C	oral-cancer	cancer	11.8	0
ondansetron	C	ovarian-cancer	cancer	14.0476	0
ondansetron	C	pancreatic-cancer	cancer	5.46296	3.66374e-15
ondansetron	C	prostate-cancer	cancer	6.55556	1.11022e-16
ondansetron	C	skin-cancer	cancer	4.09722	0.000504454
pipenzolate bromide	C	longevity	cancer	12.2917	0
pipenzolate bromide	C	adenomas-cancer	cancer	12.2917	2.37999e-10
pipenzolate bromide	C	biliary-cancer	cancer	8.74074	1.74453e-07
pipenzolate bromide	C	bladder-cancer	cancer	5.9	6.66134e-16
pipenzolate bromide	C	brain-cancer	cancer	8.93939	0
pipenzolate bromide	C	breast-cancer	cancer	6.14583	2.22045e-16
pipenzolate bromide	C	cervical-cancer	cancer	14.75	0
pipenzolate bromide	C	colon-cancer	cancer	4.21429	8.80629e-13
pipenzolate bromide	C	esophageal-cancer	cancer	6.02041	4.44089e-16
pipenzolate bromide	C	laryngeal-cancer	cancer	5.73611	1.55843e-10
pipenzolate bromide	C	leukemia-cancer	cancer	8.19444	0
pipenzolate bromide	C	liver-cancer	cancer	6.2766	2.22045e-16
pipenzolate bromide	C	lung-cancer	cancer	5.67308	1.66533e-15
pipenzolate bromide	C	lympha-cancer	cancer	6.70455	0
pipenzolate bromide	C	mesothelioma-cancer	cancer	8.19444	0.00342487
pipenzolate bromide	C	myeloma-cancer	cancer	5.46296	0.00357442
pipenzolate bromide	C	nasopharyngeal-cancer	cancer	14.0476	0
pipenzolate bromide	C	oral-cancer	cancer	11.8	0
pipenzolate bromide	C	ovarian-cancer	cancer	14.0476	0
pipenzolate bromide	C	pancreatic-cancer	cancer	5.46296	3.66374e-15
pipenzolate bromide	C	prostate-cancer	cancer	6.55556	1.11022e-16
pipenzolate bromide	C	skin-cancer	cancer	4.09722	0.000504454
propantheline bromide	C	glioma-cancer	cancer	17.8788	0.003727
riboflavin	C	longevity	cancer	12.2917	0
riboflavin	C	adenomas-cancer	cancer	12.2917	2.37999e-10
riboflavin	C	biliary-cancer	cancer	8.74074	1.74453e-07
riboflavin	C	bladder-cancer	cancer	5.9	6.66134e-16
riboflavin	C	brain-cancer	cancer	8.93939	0
riboflavin	C	breast-cancer	cancer	6.14583	2.22045e-16
riboflavin	C	cervical-cancer	cancer	14.75	0
riboflavin	C	colon-cancer	cancer	4.21429	8.80629e-13
riboflavin	C	esophageal-cancer	cancer	6.02041	4.44089e-16
riboflavin	C	laryngeal-cancer	cancer	5.73611	1.55843e-10
riboflavin	C	leukemia-cancer	cancer	8.19444	0
riboflavin	C	liver-cancer	cancer	6.2766	2.22045e-16
riboflavin	C	lung-cancer	cancer	5.67308	1.66533e-15
riboflavin	C	lympha-cancer	cancer	6.70455	0
riboflavin	C	mesothelioma-cancer	cancer	8.19444	0.00342487
riboflavin	C	myeloma-cancer	cancer	5.46296	0.00357442
riboflavin	C	nasopharyngeal-cancer	cancer	14.0476	0
riboflavin	C	oral-cancer	cancer	11.8	0
riboflavin	C	ovarian-cancer	cancer	14.0476	0
riboflavin	C	pancreatic-cancer	cancer	5.46296	3.66374e-15
riboflavin	C	prostate-cancer	cancer	6.55556	1.11022e-16
riboflavin	C	skin-cancer	cancer	4.09722	0.000504454
succinylsulfathiazole	C	brain-cancer	cancer	6.95286	3.63265e-06
succinylsulfathiazole	C	colon-cancer	cancer	3.27778	0.000785962
succinylsulfathiazole	C	oral-cancer	cancer	5.24444	0.00382883
succinylsulfathiazole	C	pancreatic-cancer	cancer	3.64198	0.00157401
tetracycline	C	longevity	cancer	12.2917	0
tetracycline	C	adenomas-cancer	cancer	12.2917	2.37999e-10
tetracycline	C	biliary-cancer	cancer	8.74074	1.74453e-07
tetracycline	C	bladder-cancer	cancer	5.9	6.66134e-16
tetracycline	C	brain-cancer	cancer	8.93939	0
tetracycline	C	breast-cancer	cancer	6.14583	2.22045e-16
tetracycline	C	cervical-cancer	cancer	14.75	0
tetracycline	C	colon-cancer	cancer	4.21429	8.80629e-13
tetracycline	C	esophageal-cancer	cancer	6.02041	4.44089e-16
tetracycline	C	laryngeal-cancer	cancer	5.73611	1.55843e-10
tetracycline	C	leukemia-cancer	cancer	8.19444	0
tetracycline	C	liver-cancer	cancer	6.2766	2.22045e-16
tetracycline	C	lung-cancer	cancer	5.67308	1.66533e-15
tetracycline	C	lympha-cancer	cancer	6.70455	0
tetracycline	C	mesothelioma-cancer	cancer	8.19444	0.00342487
tetracycline	C	myeloma-cancer	cancer	5.46296	0.00357442
tetracycline	C	nasopharyngeal-cancer	cancer	14.0476	0
tetracycline	C	oral-cancer	cancer	11.8	0
tetracycline	C	ovarian-cancer	cancer	14.0476	0
tetracycline	C	pancreatic-cancer	cancer	5.46296	3.66374e-15
tetracycline	C	prostate-cancer	cancer	6.55556	1.11022e-16
tetracycline	C	skin-cancer	cancer	4.09722	0.000504454
dicoumarol	C	brain-cancer	cancer	8.93939	0.000132351
dicoumarol	C	colon-cancer	cancer	4.21429	0.00296559
dicoumarol	C	lung-cancer	cancer	5.67308	0.000875628
dicoumarol	C	oral-cancer	cancer	11.8	4.09149e-05
dicoumarol	C	pancreatic-cancer	cancer	5.46296	0.00102288
dipyridamole	C	longevity	cancer	10.0568	1.58354e-09
dipyridamole	C	adenomas-cancer	cancer	11.1742	1.79874e-05
dipyridamole	C	biliary-cancer	cancer	8.93939	6.46674e-05
dipyridamole	C	bladder-cancer	cancer	4.82727	2.53534e-06
dipyridamole	C	brain-cancer	cancer	7.31405	4.39711e-08
dipyridamole	C	breast-cancer	cancer	5.02841	1.72174e-06
dipyridamole	C	cervical-cancer	cancer	12.0682	2.08836e-10
dipyridamole	C	colon-cancer	cancer	3.44805	5.66467e-05
dipyridamole	C	esophageal-cancer	cancer	4.92579	2.09403e-06
dipyridamole	C	laryngeal-cancer	cancer	4.69318	0.000112194
dipyridamole	C	leukemia-cancer	cancer	6.70455	1.05152e-07
dipyridamole	C	liver-cancer	cancer	5.1354	1.40897e-06
dipyridamole	C	lung-cancer	cancer	4.64161	3.66937e-06
dipyridamole	C	lympha-cancer	cancer	5.48554	7.48838e-07
dipyridamole	C	nasopharyngeal-cancer	cancer	11.4935	3.63081e-10
dipyridamole	C	oral-cancer	cancer	9.65455	2.45795e-09
dipyridamole	C	ovarian-cancer	cancer	11.4935	3.63081e-10
dipyridamole	C	pancreatic-cancer	cancer	4.4697	5.22699e-06
dipyridamole	C	prostate-cancer	cancer	5.36364	9.29437e-07
dipyridamole	C	skin-cancer	cancer	4.78896	0.00167268
phenindione	C	longevity	cancer	2.95	0.00950289
phenindione	C	cervical-cancer	cancer	3.54	0.00347195
phenindione	C	nasopharyngeal-cancer	cancer	3.37143	0.00458053
phenindione	C	ovarian-cancer	cancer	3.37143	0.00458053
raubasine	C	longevity	cancer	12.2917	0
raubasine	C	adenomas-cancer	cancer	12.2917	2.37999e-10
raubasine	C	biliary-cancer	cancer	8.74074	1.74453e-07
raubasine	C	bladder-cancer	cancer	5.9	6.66134e-16
raubasine	C	brain-cancer	cancer	8.93939	0
raubasine	C	breast-cancer	cancer	6.14583	2.22045e-16
raubasine	C	cervical-cancer	cancer	14.75	0
raubasine	C	colon-cancer	cancer	4.21429	8.80629e-13
raubasine	C	esophageal-cancer	cancer	6.02041	4.44089e-16
raubasine	C	laryngeal-cancer	cancer	5.73611	1.55843e-10
raubasine	C	leukemia-cancer	cancer	8.19444	0
raubasine	C	liver-cancer	cancer	6.2766	2.22045e-16
raubasine	C	lung-cancer	cancer	5.67308	1.66533e-15
raubasine	C	lympha-cancer	cancer	6.70455	0
raubasine	C	mesothelioma-cancer	cancer	8.19444	0.00342487
raubasine	C	myeloma-cancer	cancer	5.46296	0.00357442
raubasine	C	nasopharyngeal-cancer	cancer	14.0476	0
raubasine	C	oral-cancer	cancer	11.8	0
raubasine	C	ovarian-cancer	cancer	14.0476	0
raubasine	C	pancreatic-cancer	cancer	5.46296	3.66374e-15
raubasine	C	prostate-cancer	cancer	6.55556	1.11022e-16
raubasine	C	skin-cancer	cancer	4.09722	0.000504454
acetohexamide	C	lung-cancer	cardiovascular	5.84615	0.000124157
amphotericin b	C	angina	cardiovascular	101.333	0.00986842
benfluorex	C	glioma-cancer	cardiovascular	12.6667	0.007575
benfotiamine	C	brain-cancer	cardiovascular	9.21212	9.61985e-08
benfotiamine	C	colon-cancer	cardiovascular	4.34286	2.69942e-05
benfotiamine	C	oral-cancer	cardiovascular	6.94857	0.00106752
benfotiamine	C	pancreatic-cancer	cardiovascular	4.8254	0.000149383
carbenoxolone	C	lympha-cancer	cardiovascular	4.60606	0.00465909
chlorhexidine	C	lung-cancer	cardiovascular	2.46154	0.00720416
chlorpropamide	C	glioma-cancer	cardiovascular	101.333	6.51381e-05
chlorpropamide	C	thyroid-cancer	cardiovascular	13.2174	0.00549331
cimetidine	C	brain-cancer	cardiovascular	5.18182	4.76066e-06
cisapride	C	brain-cancer	cardiovascular	7.3697	0.000541093
cisapride	C	lung-cancer	cardiovascular	4.67692	0.00338327
cisapride	C	oral-cancer	cardiovascular	9.728	0.000171141
cisapride	C	pancreatic-cancer	cardiovascular	4.5037	0.00392804
doxycycline	C	brain-cancer	cardiovascular	9.21212	0.000117289
doxycycline	C	colon-cancer	cardiovascular	4.34286	0.0026281
doxycycline	C	lung-cancer	cardiovascular	5.84615	0.000775979
doxycycline	C	oral-cancer	cardiovascular	12.16	3.62587e-05
doxycycline	C	pancreatic-cancer	cardiovascular	5.62963	0.00090647
hesperetin	C	brain-cancer	cardiovascular	6.44848	9.08537e-06
hesperetin	C	colon-cancer	cardiovascular	3.04	0.00175059
hesperetin	C	oral-cancer	cardiovascular	4.864	0.00538747
hesperetin	C	pancreatic-cancer	cardiovascular	3.37778	0.00287132
lansoprazole	C	longevity	cardiovascular	11.4	0
lansoprazole	C	adenomas-cancer	cardiovascular	11.4	6.1496e-10
lansoprazole	C	biliary-cancer	cardiovascular	9.12	1.26141e-08
lansoprazole	C	bladder-cancer	cardiovascular	5.472	5.9619e-14
lansoprazole	C	brain-cancer	cardiovascular	8.29091	0
lansoprazole	C	breast-cancer	cardiovascular	6.01667	3.33067e-16
lansoprazole	C	cervical-cancer	cardiovascular	14.44	0
lansoprazole	C	colon-cancer	cardiovascular	4.12571	1.52289e-12
lansoprazole	C	esophageal-cancer	cardiovascular	5.58367	3.84137e-14
lansoprazole	C	laryngeal-cancer	cardiovascular	5.32	1.08832e-09
lansoprazole	C	leukemia-cancer	cardiovascular	7.6	0
lansoprazole	C	liver-cancer	cardiovascular	5.82128	1.54321e-14
lansoprazole	C	lung-cancer	cardiovascular	5.26154	1.38778e-13
lansoprazole	C	lympha-cancer	cardiovascular	6.21818	3.55271e-15
lansoprazole	C	mesothelioma-cancer	cardiovascular	7.6	0.00431908
lansoprazole	C	myeloma-cancer	cardiovascular	5.06667	0.00484475
lansoprazole	C	nasopharyngeal-cancer	cardiovascular	13.0286	0
lansoprazole	C	oral-cancer	cardiovascular	10.944	0
lansoprazole	C	ovarian-cancer	cardiovascular	13.0286	0
lansoprazole	C	pancreatic-cancer	cardiovascular	5.06667	3.1064e-13
lansoprazole	C	prostate-cancer	cardiovascular	6.41778	1.11022e-16
lansoprazole	C	skin-cancer	cardiovascular	3.8	0.000892357
lansoprazole	C	stomach-cancer	cardiovascular	6.84	4.44089e-16
lansoprazole	C	testicular-cancer	cardiovascular	15.2	0
lansoprazole	C	thyroid-cancer	cardiovascular	11.8957	0
mepenzolate bromide	C	brain-cancer	cardiovascular	9.21212	0.000117289
mepenzolate bromide	C	colon-cancer	cardiovascular	4.34286	0.0026281
mepenzolate bromide	C	lung-cancer	cardiovascular	5.84615	0.000775979
mepenzolate bromide	C	oral-cancer	cardiovascular	12.16	3.62587e-05
mepenzolate bromide	C	pancreatic-cancer	cardiovascular	5.62963	0.00090647
metronidazole	C	brain-cancer	cardiovascular	5.669	7.32476e-06
metronidazole	C	colon-cancer	cardiovascular	3.00659	0.000375978
metronidazole	C	lung-cancer	cardiovascular	3.14793	0.00220017
metronidazole	C	oral-cancer	cardiovascular	4.67692	0.00206078
metronidazole	C	pancreatic-cancer	cardiovascular	3.46439	0.000385676
nadide	C	adenomas-cancer	cardiovascular	16.8889	0.00420421
nadide	C	biliary-cancer	cardiovascular	20.2667	9.81385e-05
nadide	C	testicular-cancer	cardiovascular	11.2593	0.00961412
nystatin	C	longevity	cardiovascular	9.5	0.00165485
nystatin	C	adenomas-cancer	cardiovascular	12.6667	0.00822287
nystatin	C	brain-cancer	cardiovascular	6.90909	0.00435533
nystatin	C	cervical-cancer	cardiovascular	11.4	0.00094188
nystatin	C	laryngeal-cancer	cardiovascular	5.7	0.00773818
nystatin	C	leukemia-cancer	cardiovascular	6.33333	0.00565356
nystatin	C	mesothelioma-cancer	cardiovascular	25.3333	0.00191976
nystatin	C	myeloma-cancer	cardiovascular	12.6667	0.00822287
nystatin	C	nasopharyngeal-cancer	cardiovascular	10.8571	0.001096
nystatin	C	oral-cancer	cardiovascular	9.12	0.00187556
nystatin	C	ovarian-cancer	cardiovascular	10.8571	0.001096
nystatin	C	stomach-cancer	cardiovascular	5.7	0.00773818
nystatin	C	testicular-cancer	cardiovascular	12.6667	0.000677696
nystatin	C	thyroid-cancer	cardiovascular	9.91304	0.0014518
omeprazole	C	longevity	cardiovascular	12	0
omeprazole	C	adenomas-cancer	cardiovascular	12	3.41449e-10
omeprazole	C	biliary-cancer	cardiovascular	8.53333	2.32753e-07
omeprazole	C	bladder-cancer	cardiovascular	5.76	6.66134e-15
omeprazole	C	brain-cancer	cardiovascular	8.72727	0
omeprazole	C	breast-cancer	cardiovascular	6	2.77556e-15
omeprazole	C	cervical-cancer	cardiovascular	14.4	0
omeprazole	C	colon-cancer	cardiovascular	4.11429	7.93565e-12
omeprazole	C	esophageal-cancer	cardiovascular	5.87755	4.32987e-15
omeprazole	C	laryngeal-cancer	cardiovascular	5.6	3.56773e-10
omeprazole	C	leukemia-cancer	cardiovascular	8	0
omeprazole	C	liver-cancer	cardiovascular	6.12766	1.66533e-15
omeprazole	C	lung-cancer	cardiovascular	5.53846	1.56541e-14
omeprazole	C	lympha-cancer	cardiovascular	6.54545	4.44089e-16
omeprazole	C	mesothelioma-cancer	cardiovascular	8	0.00369985
omeprazole	C	myeloma-cancer	cardiovascular	5.33333	0.00396268
omeprazole	C	nasopharyngeal-cancer	cardiovascular	13.7143	0
omeprazole	C	oral-cancer	cardiovascular	11.52	0
omeprazole	C	ovarian-cancer	cardiovascular	13.7143	0
omeprazole	C	pancreatic-cancer	cardiovascular	5.33333	3.53051e-14
omeprazole	C	prostate-cancer	cardiovascular	6.4	6.66134e-16
omeprazole	C	skin-cancer	cardiovascular	4	0.000619192
omeprazole	C	stomach-cancer	cardiovascular	7.2	0
omeprazole	C	testicular-cancer	cardiovascular	16	0
omeprazole	C	thyroid-cancer	cardiovascular	12.5217	0
ondansetron	C	longevity	cardiovascular	12.6667	0
ondansetron	C	adenomas-cancer	cardiovascular	12.6667	1.81416e-10
ondansetron	C	biliary-cancer	cardiovascular	9.00741	1.37729e-07
ondansetron	C	bladder-cancer	cardiovascular	6.08	4.44089e-16
ondansetron	C	brain-cancer	cardiovascular	9.21212	0
ondansetron	C	breast-cancer	cardiovascular	6.33333	1.11022e-16
ondansetron	C	cervical-cancer	cardiovascular	15.2	0
ondansetron	C	colon-cancer	cardiovascular	4.34286	5.04596e-13
ondansetron	C	esophageal-cancer	cardiovascular	6.20408	2.22045e-16
ondansetron	C	laryngeal-cancer	cardiovascular	5.91111	1.02567e-10
ondansetron	C	leukemia-cancer	cardiovascular	8.44444	0
ondansetron	C	liver-cancer	cardiovascular	6.46809	1.11022e-16
ondansetron	C	lung-cancer	cardiovascular	5.84615	8.88178e-16
ondansetron	C	lympha-cancer	cardiovascular	6.90909	0
ondansetron	C	mesothelioma-cancer	cardiovascular	8.44444	0.00313991
ondansetron	C	myeloma-cancer	cardiovascular	5.62963	0.00319843
ondansetron	C	nasopharyngeal-cancer	cardiovascular	14.4762	0
ondansetron	C	oral-cancer	cardiovascular	12.16	0
ondansetron	C	ovarian-cancer	cardiovascular	14.4762	0
ondansetron	C	pancreatic-cancer	cardiovascular	5.62963	2.10942e-15
ondansetron	C	prostate-cancer	cardiovascular	6.75556	0
ondansetron	C	skin-cancer	cardiovascular	4.22222	0.000417422
ondansetron	C	stomach-cancer	cardiovascular	7.6	0
ondansetron	C	testicular-cancer	cardiovascular	16.8889	0
ondansetron	C	thyroid-cancer	cardiovascular	13.2174	0
pipenzolate bromide	C	longevity	cardiovascular	12.6667	0
pipenzolate bromide	C	adenomas-cancer	cardiovascular	12.6667	1.81416e-10
pipenzolate bromide	C	biliary-cancer	cardiovascular	9.00741	1.37729e-07
pipenzolate bromide	C	bladder-cancer	cardiovascular	6.08	4.44089e-16
pipenzolate bromide	C	brain-cancer	cardiovascular	9.21212	0
pipenzolate bromide	C	breast-cancer	cardiovascular	6.33333	1.11022e-16
pipenzolate bromide	C	cervical-cancer	cardiovascular	15.2	0
pipenzolate bromide	C	colon-cancer	cardiovascular	4.34286	5.04596e-13
pipenzolate bromide	C	esophageal-cancer	cardiovascular	6.20408	2.22045e-16
pipenzolate bromide	C	laryngeal-cancer	cardiovascular	5.91111	1.02567e-10
pipenzolate bromide	C	leukemia-cancer	cardiovascular	8.44444	0
pipenzolate bromide	C	liver-cancer	cardiovascular	6.46809	1.11022e-16
pipenzolate bromide	C	lung-cancer	cardiovascular	5.84615	8.88178e-16
pipenzolate bromide	C	lympha-cancer	cardiovascular	6.90909	0
pipenzolate bromide	C	mesothelioma-cancer	cardiovascular	8.44444	0.00313991
pipenzolate bromide	C	myeloma-cancer	cardiovascular	5.62963	0.00319843
pipenzolate bromide	C	nasopharyngeal-cancer	cardiovascular	14.4762	0
pipenzolate bromide	C	oral-cancer	cardiovascular	12.16	0
pipenzolate bromide	C	ovarian-cancer	cardiovascular	14.4762	0
pipenzolate bromide	C	pancreatic-cancer	cardiovascular	5.62963	2.10942e-15
pipenzolate bromide	C	prostate-cancer	cardiovascular	6.75556	0
pipenzolate bromide	C	skin-cancer	cardiovascular	4.22222	0.000417422
pipenzolate bromide	C	stomach-cancer	cardiovascular	7.6	0
pipenzolate bromide	C	testicular-cancer	cardiovascular	16.8889	0
pipenzolate bromide	C	thyroid-cancer	cardiovascular	13.2174	0
propantheline bromide	C	glioma-cancer	cardiovascular	18.4242	0.00351142
riboflavin	C	longevity	cardiovascular	12.6667	0
riboflavin	C	adenomas-cancer	cardiovascular	12.6667	1.81416e-10
riboflavin	C	biliary-cancer	cardiovascular	9.00741	1.37729e-07
riboflavin	C	bladder-cancer	cardiovascular	6.08	4.44089e-16
riboflavin	C	brain-cancer	cardiovascular	9.21212	0
riboflavin	C	breast-cancer	cardiovascular	6.33333	1.11022e-16
riboflavin	C	cervical-cancer	cardiovascular	15.2	0
riboflavin	C	colon-cancer	cardiovascular	4.34286	5.04596e-13
riboflavin	C	esophageal-cancer	cardiovascular	6.20408	2.22045e-16
riboflavin	C	laryngeal-cancer	cardiovascular	5.91111	1.02567e-10
riboflavin	C	leukemia-cancer	cardiovascular	8.44444	0
riboflavin	C	liver-cancer	cardiovascular	6.46809	1.11022e-16
riboflavin	C	lung-cancer	cardiovascular	5.84615	8.88178e-16
riboflavin	C	lympha-cancer	cardiovascular	6.90909	0
riboflavin	C	mesothelioma-cancer	cardiovascular	8.44444	0.00313991
riboflavin	C	myeloma-cancer	cardiovascular	5.62963	0.00319843
riboflavin	C	nasopharyngeal-cancer	cardiovascular	14.4762	0
riboflavin	C	oral-cancer	cardiovascular	12.16	0
riboflavin	C	ovarian-cancer	cardiovascular	14.4762	0
riboflavin	C	pancreatic-cancer	cardiovascular	5.62963	2.10942e-15
riboflavin	C	prostate-cancer	cardiovascular	6.75556	0
riboflavin	C	skin-cancer	cardiovascular	4.22222	0.000417422
riboflavin	C	stomach-cancer	cardiovascular	7.6	0
riboflavin	C	testicular-cancer	cardiovascular	16.8889	0
riboflavin	C	thyroid-cancer	cardiovascular	13.2174	0
succinylsulfathiazole	C	brain-cancer	cardiovascular	7.16498	2.95251e-06
succinylsulfathiazole	C	colon-cancer	cardiovascular	3.37778	0.000644632
succinylsulfathiazole	C	oral-cancer	cardiovascular	5.40444	0.00342441
succinylsulfathiazole	C	pancreatic-cancer	cardiovascular	3.75309	0.00133211
tetracycline	C	longevity	cardiovascular	12.6667	0
tetracycline	C	adenomas-cancer	cardiovascular	12.6667	1.81416e-10
tetracycline	C	biliary-cancer	cardiovascular	9.00741	1.37729e-07
tetracycline	C	bladder-cancer	cardiovascular	6.08	4.44089e-16
tetracycline	C	brain-cancer	cardiovascular	9.21212	0
tetracycline	C	breast-cancer	cardiovascular	6.33333	1.11022e-16
tetracycline	C	cervical-cancer	cardiovascular	15.2	0
tetracycline	C	colon-cancer	cardiovascular	4.34286	5.04596e-13
tetracycline	C	esophageal-cancer	cardiovascular	6.20408	2.22045e-16
tetracycline	C	laryngeal-cancer	cardiovascular	5.91111	1.02567e-10
tetracycline	C	leukemia-cancer	cardiovascular	8.44444	0
tetracycline	C	liver-cancer	cardiovascular	6.46809	1.11022e-16
tetracycline	C	lung-cancer	cardiovascular	5.84615	8.88178e-16
tetracycline	C	lympha-cancer	cardiovascular	6.90909	0
tetracycline	C	mesothelioma-cancer	cardiovascular	8.44444	0.00313991
tetracycline	C	myeloma-cancer	cardiovascular	5.62963	0.00319843
tetracycline	C	nasopharyngeal-cancer	cardiovascular	14.4762	0
tetracycline	C	oral-cancer	cardiovascular	12.16	0
tetracycline	C	ovarian-cancer	cardiovascular	14.4762	0
tetracycline	C	pancreatic-cancer	cardiovascular	5.62963	2.10942e-15
tetracycline	C	prostate-cancer	cardiovascular	6.75556	0
tetracycline	C	skin-cancer	cardiovascular	4.22222	0.000417422
tetracycline	C	stomach-cancer	cardiovascular	7.6	0
tetracycline	C	testicular-cancer	cardiovascular	16.8889	0
tetracycline	C	thyroid-cancer	cardiovascular	13.2174	0
dicoumarol	C	brain-cancer	cardiovascular	9.21212	0.000117289
dicoumarol	C	colon-cancer	cardiovascular	4.34286	0.0026281
dicoumarol	C	lung-cancer	cardiovascular	5.84615	0.000775979
dicoumarol	C	oral-cancer	cardiovascular	12.16	3.62587e-05
dicoumarol	C	pancreatic-cancer	cardiovascular	5.62963	0.00090647
dipyridamole	C	longevity	cardiovascular	10.3636	1.20748e-09
dipyridamole	C	adenomas-cancer	cardiovascular	11.5152	1.55203e-05
dipyridamole	C	biliary-cancer	cardiovascular	9.21212	5.58896e-05
dipyridamole	C	bladder-cancer	cardiovascular	4.97455	1.94489e-06
dipyridamole	C	brain-cancer	cardiovascular	7.53719	3.35947e-08
dipyridamole	C	breast-cancer	cardiovascular	5.18182	1.32011e-06
dipyridamole	C	cervical-cancer	cardiovascular	12.4364	1.59109e-10
dipyridamole	C	colon-cancer	cardiovascular	3.55325	4.36905e-05
dipyridamole	C	esophageal-cancer	cardiovascular	5.07607	1.60595e-06
dipyridamole	C	laryngeal-cancer	cardiovascular	4.83636	9.1951e-05
dipyridamole	C	leukemia-cancer	cardiovascular	6.90909	8.03928e-08
dipyridamole	C	liver-cancer	cardiovascular	5.29207	1.08003e-06
dipyridamole	C	lung-cancer	cardiovascular	4.78322	2.81625e-06
dipyridamole	C	lympha-cancer	cardiovascular	5.65289	5.73594e-07
dipyridamole	C	nasopharyngeal-cancer	cardiovascular	11.8442	2.76683e-10
dipyridamole	C	oral-cancer	cardiovascular	9.94909	1.87463e-09
dipyridamole	C	ovarian-cancer	cardiovascular	11.8442	2.76683e-10
dipyridamole	C	pancreatic-cancer	cardiovascular	4.60606	4.01379e-06
dipyridamole	C	prostate-cancer	cardiovascular	5.52727	7.12101e-07
dipyridamole	C	skin-cancer	cardiovascular	4.93506	0.00145639
dipyridamole	C	stomach-cancer	cardiovascular	6.21818	2.27328e-07
dipyridamole	C	testicular-cancer	cardiovascular	13.8182	4.6642e-11
dipyridamole	C	thyroid-cancer	cardiovascular	10.8142	7.59516e-10
phenindione	C	longevity	cardiovascular	3.04	0.0081912
phenindione	C	cervical-cancer	cardiovascular	3.648	0.00297022
phenindione	C	nasopharyngeal-cancer	cardiovascular	3.47429	0.00392598
phenindione	C	ovarian-cancer	cardiovascular	3.47429	0.00392598
phenindione	C	testicular-cancer	cardiovascular	4.05333	0.00159553
phenindione	C	thyroid-cancer	cardiovascular	3.17217	0.00650855
raubasine	C	longevity	cardiovascular	12.6667	0
raubasine	C	adenomas-cancer	cardiovascular	12.6667	1.81416e-10
raubasine	C	biliary-cancer	cardiovascular	9.00741	1.37729e-07
raubasine	C	bladder-cancer	cardiovascular	6.08	4.44089e-16
raubasine	C	brain-cancer	cardiovascular	9.21212	0
raubasine	C	breast-cancer	cardiovascular	6.33333	1.11022e-16
raubasine	C	cervical-cancer	cardiovascular	15.2	0
raubasine	C	colon-cancer	cardiovascular	4.34286	5.04596e-13
raubasine	C	esophageal-cancer	cardiovascular	6.20408	2.22045e-16
raubasine	C	laryngeal-cancer	cardiovascular	5.91111	1.02567e-10
raubasine	C	leukemia-cancer	cardiovascular	8.44444	0
raubasine	C	liver-cancer	cardiovascular	6.46809	1.11022e-16
raubasine	C	lung-cancer	cardiovascular	5.84615	8.88178e-16
raubasine	C	lympha-cancer	cardiovascular	6.90909	0
raubasine	C	mesothelioma-cancer	cardiovascular	8.44444	0.00313991
raubasine	C	myeloma-cancer	cardiovascular	5.62963	0.00319843
raubasine	C	nasopharyngeal-cancer	cardiovascular	14.4762	0
raubasine	C	oral-cancer	cardiovascular	12.16	0
raubasine	C	ovarian-cancer	cardiovascular	14.4762	0
raubasine	C	pancreatic-cancer	cardiovascular	5.62963	2.10942e-15
raubasine	C	prostate-cancer	cardiovascular	6.75556	0
raubasine	C	skin-cancer	cardiovascular	4.22222	0.000417422
raubasine	C	stomach-cancer	cardiovascular	7.6	0
raubasine	C	testicular-cancer	cardiovascular	16.8889	0
raubasine	C	thyroid-cancer	cardiovascular	13.2174	0
lansoprazole	C	longevity	chemdependency	10.65	0
lansoprazole	C	adenomas-cancer	chemdependency	10.65	1.1356e-09
lansoprazole	C	biliary-cancer	chemdependency	8.52	2.31133e-08
lansoprazole	C	bladder-cancer	chemdependency	5.112	2.06835e-13
nadide	C	adenomas-cancer	chemdependency	15.7778	0.00481061
nadide	C	biliary-cancer	chemdependency	18.9333	0.000120451
nystatin	C	longevity	chemdependency	8.875	0.0020231
nystatin	C	adenomas-cancer	chemdependency	11.8333	0.00939386
omeprazole	C	longevity	chemdependency	11.2105	0
omeprazole	C	adenomas-cancer	chemdependency	11.2105	6.30978e-10
omeprazole	C	biliary-cancer	chemdependency	7.97193	3.96774e-07
omeprazole	C	bladder-cancer	chemdependency	5.38105	2.33147e-14
ondansetron	C	longevity	chemdependency	11.8333	0
ondansetron	C	adenomas-cancer	chemdependency	11.8333	3.35485e-10
ondansetron	C	biliary-cancer	chemdependency	8.41481	2.35175e-07
ondansetron	C	bladder-cancer	chemdependency	5.68	1.33227e-15
pipenzolate bromide	C	longevity	chemdependency	11.8333	0
pipenzolate bromide	C	adenomas-cancer	chemdependency	11.8333	3.35485e-10
pipenzolate bromide	C	biliary-cancer	chemdependency	8.41481	2.35175e-07
pipenzolate bromide	C	bladder-cancer	chemdependency	5.68	1.33227e-15
riboflavin	C	longevity	chemdependency	11.8333	0
riboflavin	C	adenomas-cancer	chemdependency	11.8333	3.35485e-10
riboflavin	C	biliary-cancer	chemdependency	8.41481	2.35175e-07
riboflavin	C	bladder-cancer	chemdependency	5.68	1.33227e-15
tetracycline	C	longevity	chemdependency	11.8333	0
tetracycline	C	adenomas-cancer	chemdependency	11.8333	3.35485e-10
tetracycline	C	biliary-cancer	chemdependency	8.41481	2.35175e-07
tetracycline	C	bladder-cancer	chemdependency	5.68	1.33227e-15
dipyridamole	C	longevity	chemdependency	9.68182	2.23115e-09
dipyridamole	C	adenomas-cancer	chemdependency	10.7576	2.16734e-05
dipyridamole	C	biliary-cancer	chemdependency	8.60606	7.7751e-05
dipyridamole	C	bladder-cancer	chemdependency	4.64727	3.54398e-06
raubasine	C	longevity	chemdependency	11.8333	0
raubasine	C	adenomas-cancer	chemdependency	11.8333	3.35485e-10
raubasine	C	biliary-cancer	chemdependency	8.41481	2.35175e-07
raubasine	C	bladder-cancer	chemdependency	5.68	1.33227e-15
lansoprazole	C	longevity	developmental	9.525	0
lansoprazole	C	adenomas-cancer	developmental	9.525	3.10613e-09
nadide	C	adenomas-cancer	developmental	14.1111	0.00599925
nystatin	C	longevity	developmental	7.9375	0.0028114
omeprazole	C	longevity	developmental	10.0263	0
omeprazole	C	adenomas-cancer	developmental	10.0263	1.72812e-09
ondansetron	C	longevity	developmental	10.5833	0
ondansetron	C	adenomas-cancer	developmental	10.5833	9.20017e-10
pipenzolate bromide	C	longevity	developmental	10.5833	0
pipenzolate bromide	C	adenomas-cancer	developmental	10.5833	9.20017e-10
riboflavin	C	longevity	developmental	10.5833	0
riboflavin	C	adenomas-cancer	developmental	10.5833	9.20017e-10
tetracycline	C	longevity	developmental	10.5833	0
tetracycline	C	adenomas-cancer	developmental	10.5833	9.20017e-10
dipyridamole	C	longevity	developmental	8.65909	6.10953e-09
dipyridamole	C	adenomas-cancer	developmental	9.62121	3.74435e-05
raubasine	C	longevity	developmental	10.5833	0
raubasine	C	adenomas-cancer	developmental	10.5833	9.20017e-10
benfotiamine	C	brain-cancer	hematological	8.12121	2.34656e-07
benfotiamine	C	colon-cancer	hematological	3.82857	6.58466e-05
cimetidine	C	brain-cancer	hematological	4.56818	1.39092e-05
cisapride	C	brain-cancer	hematological	6.49697	0.000887965
doxycycline	C	brain-cancer	hematological	8.12121	0.000194703
doxycycline	C	colon-cancer	hematological	3.82857	0.00436272
hesperetin	C	brain-cancer	hematological	5.68485	2.14072e-05
hesperetin	C	colon-cancer	hematological	2.68	0.00388123
lansoprazole	C	longevity	hematological	10.05	0
lansoprazole	C	adenomas-cancer	hematological	10.05	1.91516e-09
lansoprazole	C	biliary-cancer	hematological	8.04	3.87043e-08
lansoprazole	C	bladder-cancer	hematological	4.824	5.97411e-13
lansoprazole	C	brain-cancer	hematological	7.30909	0
lansoprazole	C	breast-cancer	hematological	5.30417	3.55271e-15
lansoprazole	C	cervical-cancer	hematological	12.73	0
lansoprazole	C	colon-cancer	hematological	3.63714	1.75373e-11
mepenzolate bromide	C	brain-cancer	hematological	8.12121	0.000194703
mepenzolate bromide	C	colon-cancer	hematological	3.82857	0.00436272
metronidazole	C	brain-cancer	hematological	4.99767	1.92053e-05
metronidazole	C	colon-cancer	hematological	2.65055	0.00104402
nadide	C	adenomas-cancer	hematological	14.8889	0.00539543
nadide	C	biliary-cancer	hematological	17.8667	0.000143428
nystatin	C	longevity	hematological	8.375	0.0024004
nystatin	C	brain-cancer	hematological	6.09091	0.00629541
nystatin	C	cervical-cancer	hematological	10.05	0.00136828
omeprazole	C	longevity	hematological	10.5789	0
omeprazole	C	adenomas-cancer	hematological	10.5789	1.06483e-09
omeprazole	C	biliary-cancer	hematological	7.52281	6.24618e-07
omeprazole	C	bladder-cancer	hematological	5.07789	6.80567e-14
omeprazole	C	brain-cancer	hematological	7.69378	0
omeprazole	C	breast-cancer	hematological	5.28947	2.77556e-14
omeprazole	C	cervical-cancer	hematological	12.6947	0
omeprazole	C	colon-cancer	hematological	3.62707	7.98523e-11
ondansetron	C	longevity	hematological	11.1667	0
ondansetron	C	adenomas-cancer	hematological	11.1667	5.66527e-10
ondansetron	C	biliary-cancer	hematological	7.94074	3.70782e-07
ondansetron	C	bladder-cancer	hematological	5.36	4.10783e-15
ondansetron	C	brain-cancer	hematological	8.12121	0
ondansetron	C	breast-cancer	hematological	5.58333	1.66533e-15
ondansetron	C	cervical-cancer	hematological	13.4	0
ondansetron	C	colon-cancer	hematological	3.82857	5.23415e-12
pipenzolate bromide	C	longevity	hematological	11.1667	0
pipenzolate bromide	C	adenomas-cancer	hematological	11.1667	5.66527e-10
pipenzolate bromide	C	biliary-cancer	hematological	7.94074	3.70782e-07
pipenzolate bromide	C	bladder-cancer	hematological	5.36	4.10783e-15
pipenzolate bromide	C	brain-cancer	hematological	8.12121	0
pipenzolate bromide	C	breast-cancer	hematological	5.58333	1.66533e-15
pipenzolate bromide	C	cervical-cancer	hematological	13.4	0
pipenzolate bromide	C	colon-cancer	hematological	3.82857	5.23415e-12
riboflavin	C	longevity	hematological	11.1667	0
riboflavin	C	adenomas-cancer	hematological	11.1667	5.66527e-10
riboflavin	C	biliary-cancer	hematological	7.94074	3.70782e-07
riboflavin	C	bladder-cancer	hematological	5.36	4.10783e-15
riboflavin	C	brain-cancer	hematological	8.12121	0
riboflavin	C	breast-cancer	hematological	5.58333	1.66533e-15
riboflavin	C	cervical-cancer	hematological	13.4	0
riboflavin	C	colon-cancer	hematological	3.82857	5.23415e-12
succinylsulfathiazole	C	brain-cancer	hematological	6.3165	7.03789e-06
succinylsulfathiazole	C	colon-cancer	hematological	2.97778	0.00147528
tetracycline	C	longevity	hematological	11.1667	0
tetracycline	C	adenomas-cancer	hematological	11.1667	5.66527e-10
tetracycline	C	biliary-cancer	hematological	7.94074	3.70782e-07
tetracycline	C	bladder-cancer	hematological	5.36	4.10783e-15
tetracycline	C	brain-cancer	hematological	8.12121	0
tetracycline	C	breast-cancer	hematological	5.58333	1.66533e-15
tetracycline	C	cervical-cancer	hematological	13.4	0
tetracycline	C	colon-cancer	hematological	3.82857	5.23415e-12
dicoumarol	C	brain-cancer	hematological	8.12121	0.000194703
dicoumarol	C	colon-cancer	hematological	3.82857	0.00436272
dipyridamole	C	longevity	hematological	9.13636	3.7649e-09
dipyridamole	C	adenomas-cancer	hematological	10.1515	2.87964e-05
dipyridamole	C	biliary-cancer	hematological	8.12121	0.000102945
dipyridamole	C	bladder-cancer	hematological	4.38545	5.90377e-06
dipyridamole	C	brain-cancer	hematological	6.64463	1.03838e-07
dipyridamole	C	breast-cancer	hematological	4.56818	4.01623e-06
dipyridamole	C	cervical-cancer	hematological	10.9636	4.97941e-10
dipyridamole	C	colon-cancer	hematological	3.13247	0.000129425
phenindione	C	cervical-cancer	hematological	3.216	0.00568305
raubasine	C	longevity	hematological	11.1667	0
raubasine	C	adenomas-cancer	hematological	11.1667	5.66527e-10
raubasine	C	biliary-cancer	hematological	7.94074	3.70782e-07
raubasine	C	bladder-cancer	hematological	5.36	4.10783e-15
raubasine	C	brain-cancer	hematological	8.12121	0
raubasine	C	breast-cancer	hematological	5.58333	1.66533e-15
raubasine	C	cervical-cancer	hematological	13.4	0
raubasine	C	colon-cancer	hematological	3.82857	5.23415e-12
acetohexamide	C	lung-cancer	immune	5.67308	0.000144434
benfluorex	C	glioma-cancer	immune	12.2917	0.00803718
benfotiamine	C	brain-cancer	immune	8.93939	1.18976e-07
benfotiamine	C	colon-cancer	immune	4.21429	3.33856e-05
benfotiamine	C	oral-cancer	immune	6.74286	0.00119799
benfotiamine	C	pancreatic-cancer	immune	4.68254	0.000178279
carbenoxolone	C	lympha-cancer	immune	4.4697	0.00521874
chlorhexidine	C	lung-cancer	immune	2.38866	0.0087143
chlorpropamide	C	glioma-cancer	immune	98.3333	6.91802e-05
cimetidine	C	brain-cancer	immune	5.02841	6.15258e-06
cisapride	C	brain-cancer	immune	7.15152	0.000608996
cisapride	C	lung-cancer	immune	4.53846	0.00380041
cisapride	C	oral-cancer	immune	9.44	0.000192764
cisapride	C	pancreatic-cancer	immune	4.37037	0.00441138
doxycycline	C	brain-cancer	immune	8.93939	0.000132351
doxycycline	C	colon-cancer	immune	4.21429	0.00296559
doxycycline	C	lung-cancer	immune	5.67308	0.000875628
doxycycline	C	oral-cancer	immune	11.8	4.09149e-05
doxycycline	C	pancreatic-cancer	immune	5.46296	0.00102288
hesperetin	C	brain-cancer	immune	6.25758	1.11491e-05
hesperetin	C	colon-cancer	immune	2.95	0.00211928
hesperetin	C	oral-cancer	immune	4.72	0.00601267
hesperetin	C	pancreatic-cancer	immune	3.27778	0.00337593
lansoprazole	C	longevity	immune	11.0625	0
lansoprazole	C	adenomas-cancer	immune	11.0625	8.06265e-10
lansoprazole	C	biliary-cancer	immune	8.85	1.64828e-08
lansoprazole	C	bladder-cancer	immune	5.31	1.03251e-13
lansoprazole	C	brain-cancer	immune	8.04545	0
lansoprazole	C	breast-cancer	immune	5.83854	5.55112e-16
lansoprazole	C	cervical-cancer	immune	14.0125	0
lansoprazole	C	colon-cancer	immune	4.00357	2.72593e-12
lansoprazole	C	esophageal-cancer	immune	5.41837	6.66134e-14
lansoprazole	C	laryngeal-cancer	immune	5.1625	1.6437e-09
lansoprazole	C	leukemia-cancer	immune	7.375	1.11022e-16
lansoprazole	C	liver-cancer	immune	5.64894	2.67564e-14
lansoprazole	C	lung-cancer	immune	5.10577	2.40252e-13
lansoprazole	C	lympha-cancer	immune	6.03409	6.21725e-15
lansoprazole	C	mesothelioma-cancer	immune	7.375	0.0047087
lansoprazole	C	myeloma-cancer	immune	4.91667	0.00540658
lansoprazole	C	nasopharyngeal-cancer	immune	12.6429	0
lansoprazole	C	oral-cancer	immune	10.62	0
lansoprazole	C	ovarian-cancer	immune	12.6429	0
lansoprazole	C	pancreatic-cancer	immune	4.91667	5.37348e-13
lansoprazole	C	prostate-cancer	immune	6.22778	1.11022e-16
lansoprazole	C	skin-cancer	immune	3.6875	0.00107378
lansoprazole	C	stomach-cancer	immune	6.6375	6.66134e-16
mepenzolate bromide	C	brain-cancer	immune	8.93939	0.000132351
mepenzolate bromide	C	colon-cancer	immune	4.21429	0.00296559
mepenzolate bromide	C	lung-cancer	immune	5.67308	0.000875628
mepenzolate bromide	C	oral-cancer	immune	11.8	4.09149e-05
mepenzolate bromide	C	pancreatic-cancer	immune	5.46296	0.00102288
metronidazole	C	brain-cancer	immune	5.50117	9.22291e-06
metronidazole	C	colon-cancer	immune	2.91758	0.000480472
metronidazole	C	lung-cancer	immune	3.05473	0.00264401
metronidazole	C	oral-cancer	immune	4.53846	0.00236217
metronidazole	C	pancreatic-cancer	immune	3.36182	0.000479625
nadide	C	adenomas-cancer	immune	16.3889	0.00446201
nadide	C	biliary-cancer	immune	19.6667	0.00010743
nystatin	C	longevity	immune	9.21875	0.00180844
nystatin	C	adenomas-cancer	immune	12.2917	0.00872104
nystatin	C	brain-cancer	immune	6.70455	0.00475581
nystatin	C	cervical-cancer	immune	11.0625	0.00102965
nystatin	C	laryngeal-cancer	immune	5.53125	0.00844429
nystatin	C	leukemia-cancer	immune	6.14583	0.00617174
nystatin	C	mesothelioma-cancer	immune	24.5833	0.00203777
nystatin	C	myeloma-cancer	immune	12.2917	0.00872104
nystatin	C	nasopharyngeal-cancer	immune	10.5357	0.00119803
nystatin	C	oral-cancer	immune	8.85	0.00204947
nystatin	C	ovarian-cancer	immune	10.5357	0.00119803
nystatin	C	stomach-cancer	immune	5.53125	0.00844429
omeprazole	C	longevity	immune	11.6447	0
omeprazole	C	adenomas-cancer	immune	11.6447	4.47808e-10
omeprazole	C	biliary-cancer	immune	8.2807	2.94604e-07
omeprazole	C	bladder-cancer	immune	5.58947	1.15463e-14
omeprazole	C	brain-cancer	immune	8.4689	0
omeprazole	C	breast-cancer	immune	5.82237	4.77396e-15
omeprazole	C	cervical-cancer	immune	13.9737	0
omeprazole	C	colon-cancer	immune	3.99248	1.37563e-11
omeprazole	C	esophageal-cancer	immune	5.70354	7.43849e-15
omeprazole	C	laryngeal-cancer	immune	5.43421	5.40464e-10
omeprazole	C	leukemia-cancer	immune	7.76316	0
omeprazole	C	liver-cancer	immune	5.94625	2.9976e-15
omeprazole	C	lung-cancer	immune	5.37449	2.72005e-14
omeprazole	C	lympha-cancer	immune	6.35167	6.66134e-16
omeprazole	C	mesothelioma-cancer	immune	7.76316	0.00403462
omeprazole	C	myeloma-cancer	immune	5.17544	0.00442537
omeprazole	C	nasopharyngeal-cancer	immune	13.3083	0
omeprazole	C	oral-cancer	immune	11.1789	0
omeprazole	C	ovarian-cancer	immune	13.3083	0
omeprazole	C	pancreatic-cancer	immune	5.17544	6.12843e-14
omeprazole	C	prostate-cancer	immune	6.21053	1.11022e-15
omeprazole	C	skin-cancer	immune	3.88158	0.000746688
omeprazole	C	stomach-cancer	immune	6.98684	1.11022e-16
ondansetron	C	longevity	immune	12.2917	0
ondansetron	C	adenomas-cancer	immune	12.2917	2.37999e-10
ondansetron	C	biliary-cancer	immune	8.74074	1.74453e-07
ondansetron	C	bladder-cancer	immune	5.9	6.66134e-16
ondansetron	C	brain-cancer	immune	8.93939	0
ondansetron	C	breast-cancer	immune	6.14583	2.22045e-16
ondansetron	C	cervical-cancer	immune	14.75	0
ondansetron	C	colon-cancer	immune	4.21429	8.80629e-13
ondansetron	C	esophageal-cancer	immune	6.02041	4.44089e-16
ondansetron	C	laryngeal-cancer	immune	5.73611	1.55843e-10
ondansetron	C	leukemia-cancer	immune	8.19444	0
ondansetron	C	liver-cancer	immune	6.2766	2.22045e-16
ondansetron	C	lung-cancer	immune	5.67308	1.66533e-15
ondansetron	C	lympha-cancer	immune	6.70455	0
ondansetron	C	mesothelioma-cancer	immune	8.19444	0.00342487
ondansetron	C	myeloma-cancer	immune	5.46296	0.00357442
ondansetron	C	nasopharyngeal-cancer	immune	14.0476	0
ondansetron	C	oral-cancer	immune	11.8	0
ondansetron	C	ovarian-cancer	immune	14.0476	0
ondansetron	C	pancreatic-cancer	immune	5.46296	3.66374e-15
ondansetron	C	prostate-cancer	immune	6.55556	1.11022e-16
ondansetron	C	skin-cancer	immune	4.09722	0.000504454
ondansetron	C	stomach-cancer	immune	7.375	0
pipenzolate bromide	C	longevity	immune	12.2917	0
pipenzolate bromide	C	adenomas-cancer	immune	12.2917	2.37999e-10
pipenzolate bromide	C	biliary-cancer	immune	8.74074	1.74453e-07
pipenzolate bromide	C	bladder-cancer	immune	5.9	6.66134e-16
pipenzolate bromide	C	brain-cancer	immune	8.93939	0
pipenzolate bromide	C	breast-cancer	immune	6.14583	2.22045e-16
pipenzolate bromide	C	cervical-cancer	immune	14.75	0
pipenzolate bromide	C	colon-cancer	immune	4.21429	8.80629e-13
pipenzolate bromide	C	esophageal-cancer	immune	6.02041	4.44089e-16
pipenzolate bromide	C	laryngeal-cancer	immune	5.73611	1.55843e-10
pipenzolate bromide	C	leukemia-cancer	immune	8.19444	0
pipenzolate bromide	C	liver-cancer	immune	6.2766	2.22045e-16
pipenzolate bromide	C	lung-cancer	immune	5.67308	1.66533e-15
pipenzolate bromide	C	lympha-cancer	immune	6.70455	0
pipenzolate bromide	C	mesothelioma-cancer	immune	8.19444	0.00342487
pipenzolate bromide	C	myeloma-cancer	immune	5.46296	0.00357442
pipenzolate bromide	C	nasopharyngeal-cancer	immune	14.0476	0
pipenzolate bromide	C	oral-cancer	immune	11.8	0
pipenzolate bromide	C	ovarian-cancer	immune	14.0476	0
pipenzolate bromide	C	pancreatic-cancer	immune	5.46296	3.66374e-15
pipenzolate bromide	C	prostate-cancer	immune	6.55556	1.11022e-16
pipenzolate bromide	C	skin-cancer	immune	4.09722	0.000504454
pipenzolate bromide	C	stomach-cancer	immune	7.375	0
propantheline bromide	C	glioma-cancer	immune	17.8788	0.003727
riboflavin	C	longevity	immune	12.2917	0
riboflavin	C	adenomas-cancer	immune	12.2917	2.37999e-10
riboflavin	C	biliary-cancer	immune	8.74074	1.74453e-07
riboflavin	C	bladder-cancer	immune	5.9	6.66134e-16
riboflavin	C	brain-cancer	immune	8.93939	0
riboflavin	C	breast-cancer	immune	6.14583	2.22045e-16
riboflavin	C	cervical-cancer	immune	14.75	0
riboflavin	C	colon-cancer	immune	4.21429	8.80629e-13
riboflavin	C	esophageal-cancer	immune	6.02041	4.44089e-16
riboflavin	C	laryngeal-cancer	immune	5.73611	1.55843e-10
riboflavin	C	leukemia-cancer	immune	8.19444	0
riboflavin	C	liver-cancer	immune	6.2766	2.22045e-16
riboflavin	C	lung-cancer	immune	5.67308	1.66533e-15
riboflavin	C	lympha-cancer	immune	6.70455	0
riboflavin	C	mesothelioma-cancer	immune	8.19444	0.00342487
riboflavin	C	myeloma-cancer	immune	5.46296	0.00357442
riboflavin	C	nasopharyngeal-cancer	immune	14.0476	0
riboflavin	C	oral-cancer	immune	11.8	0
riboflavin	C	ovarian-cancer	immune	14.0476	0
riboflavin	C	pancreatic-cancer	immune	5.46296	3.66374e-15
riboflavin	C	prostate-cancer	immune	6.55556	1.11022e-16
riboflavin	C	skin-cancer	immune	4.09722	0.000504454
riboflavin	C	stomach-cancer	immune	7.375	0
succinylsulfathiazole	C	brain-cancer	immune	6.95286	3.63265e-06
succinylsulfathiazole	C	colon-cancer	immune	3.27778	0.000785962
succinylsulfathiazole	C	oral-cancer	immune	5.24444	0.00382883
succinylsulfathiazole	C	pancreatic-cancer	immune	3.64198	0.00157401
tetracycline	C	longevity	immune	12.2917	0
tetracycline	C	adenomas-cancer	immune	12.2917	2.37999e-10
tetracycline	C	biliary-cancer	immune	8.74074	1.74453e-07
tetracycline	C	bladder-cancer	immune	5.9	6.66134e-16
tetracycline	C	brain-cancer	immune	8.93939	0
tetracycline	C	breast-cancer	immune	6.14583	2.22045e-16
tetracycline	C	cervical-cancer	immune	14.75	0
tetracycline	C	colon-cancer	immune	4.21429	8.80629e-13
tetracycline	C	esophageal-cancer	immune	6.02041	4.44089e-16
tetracycline	C	laryngeal-cancer	immune	5.73611	1.55843e-10
tetracycline	C	leukemia-cancer	immune	8.19444	0
tetracycline	C	liver-cancer	immune	6.2766	2.22045e-16
tetracycline	C	lung-cancer	immune	5.67308	1.66533e-15
tetracycline	C	lympha-cancer	immune	6.70455	0
tetracycline	C	mesothelioma-cancer	immune	8.19444	0.00342487
tetracycline	C	myeloma-cancer	immune	5.46296	0.00357442
tetracycline	C	nasopharyngeal-cancer	immune	14.0476	0
tetracycline	C	oral-cancer	immune	11.8	0
tetracycline	C	ovarian-cancer	immune	14.0476	0
tetracycline	C	pancreatic-cancer	immune	5.46296	3.66374e-15
tetracycline	C	prostate-cancer	immune	6.55556	1.11022e-16
tetracycline	C	skin-cancer	immune	4.09722	0.000504454
tetracycline	C	stomach-cancer	immune	7.375	0
dicoumarol	C	brain-cancer	immune	8.93939	0.000132351
dicoumarol	C	colon-cancer	immune	4.21429	0.00296559
dicoumarol	C	lung-cancer	immune	5.67308	0.000875628
dicoumarol	C	oral-cancer	immune	11.8	4.09149e-05
dicoumarol	C	pancreatic-cancer	immune	5.46296	0.00102288
dipyridamole	C	longevity	immune	10.0568	1.58354e-09
dipyridamole	C	adenomas-cancer	immune	11.1742	1.79874e-05
dipyridamole	C	biliary-cancer	immune	8.93939	6.46674e-05
dipyridamole	C	bladder-cancer	immune	4.82727	2.53534e-06
dipyridamole	C	brain-cancer	immune	7.31405	4.39711e-08
dipyridamole	C	breast-cancer	immune	5.02841	1.72174e-06
dipyridamole	C	cervical-cancer	immune	12.0682	2.08836e-10
dipyridamole	C	colon-cancer	immune	3.44805	5.66467e-05
dipyridamole	C	esophageal-cancer	immune	4.92579	2.09403e-06
dipyridamole	C	laryngeal-cancer	immune	4.69318	0.000112194
dipyridamole	C	leukemia-cancer	immune	6.70455	1.05152e-07
dipyridamole	C	liver-cancer	immune	5.1354	1.40897e-06
dipyridamole	C	lung-cancer	immune	4.64161	3.66937e-06
dipyridamole	C	lympha-cancer	immune	5.48554	7.48838e-07
dipyridamole	C	nasopharyngeal-cancer	immune	11.4935	3.63081e-10
dipyridamole	C	oral-cancer	immune	9.65455	2.45795e-09
dipyridamole	C	ovarian-cancer	immune	11.4935	3.63081e-10
dipyridamole	C	pancreatic-cancer	immune	4.4697	5.22699e-06
dipyridamole	C	prostate-cancer	immune	5.36364	9.29437e-07
dipyridamole	C	skin-cancer	immune	4.78896	0.00167268
dipyridamole	C	stomach-cancer	immune	6.03409	2.97064e-07
phenindione	C	longevity	immune	2.95	0.00950289
phenindione	C	cervical-cancer	immune	3.54	0.00347195
phenindione	C	nasopharyngeal-cancer	immune	3.37143	0.00458053
phenindione	C	ovarian-cancer	immune	3.37143	0.00458053
raubasine	C	longevity	immune	12.2917	0
raubasine	C	adenomas-cancer	immune	12.2917	2.37999e-10
raubasine	C	biliary-cancer	immune	8.74074	1.74453e-07
raubasine	C	bladder-cancer	immune	5.9	6.66134e-16
raubasine	C	brain-cancer	immune	8.93939	0
raubasine	C	breast-cancer	immune	6.14583	2.22045e-16
raubasine	C	cervical-cancer	immune	14.75	0
raubasine	C	colon-cancer	immune	4.21429	8.80629e-13
raubasine	C	esophageal-cancer	immune	6.02041	4.44089e-16
raubasine	C	laryngeal-cancer	immune	5.73611	1.55843e-10
raubasine	C	leukemia-cancer	immune	8.19444	0
raubasine	C	liver-cancer	immune	6.2766	2.22045e-16
raubasine	C	lung-cancer	immune	5.67308	1.66533e-15
raubasine	C	lympha-cancer	immune	6.70455	0
raubasine	C	mesothelioma-cancer	immune	8.19444	0.00342487
raubasine	C	myeloma-cancer	immune	5.46296	0.00357442
raubasine	C	nasopharyngeal-cancer	immune	14.0476	0
raubasine	C	oral-cancer	immune	11.8	0
raubasine	C	ovarian-cancer	immune	14.0476	0
raubasine	C	pancreatic-cancer	immune	5.46296	3.66374e-15
raubasine	C	prostate-cancer	immune	6.55556	1.11022e-16
raubasine	C	skin-cancer	immune	4.09722	0.000504454
raubasine	C	stomach-cancer	immune	7.375	0
benfotiamine	C	brain-cancer	infection	8.15152	2.2855e-07
cimetidine	C	brain-cancer	infection	4.58523	1.34773e-05
cisapride	C	brain-cancer	infection	6.52121	0.000875079
doxycycline	C	brain-cancer	infection	8.15152	0.000191808
hesperetin	C	brain-cancer	infection	5.70606	2.08731e-05
lansoprazole	C	longevity	infection	10.0875	0
lansoprazole	C	adenomas-cancer	infection	10.0875	1.85193e-09
lansoprazole	C	biliary-cancer	infection	8.07	3.74442e-08
lansoprazole	C	bladder-cancer	infection	4.842	5.57998e-13
lansoprazole	C	brain-cancer	infection	7.33636	0
mepenzolate bromide	C	brain-cancer	infection	8.15152	0.000191808
metronidazole	C	brain-cancer	infection	5.01632	1.86678e-05
nadide	C	adenomas-cancer	infection	14.9444	0.00535583
nadide	C	biliary-cancer	infection	17.9333	0.000141829
nystatin	C	longevity	infection	8.40625	0.00237419
[truncated: 3,168 more rows]
